# Supplementary material for: Butterfly-shaped π-extended benzothiadiazoles as promising emitting materials for white OLEDs
Source: Royal Society of Chemistry journal article supplement (doi:10.1039/c9tc01059a), 2019-01-01
Supplement: c9tc01059a1.pdf [file c9tc01059a1.pdf]

## Electronic supplementary information (ESI)

### Butterfly-shaped $\pi$ -extended benzothiadiazoles as promising emitting materials for white OLEDs

Zaibin Wang, Zhixing Peng, Kai Huang, Ping Lu\*, Yanguang Wang\*  
Department of Chemistry, Zhejiang University, Hangzhou, P. R. China  
\*Email - [pinglu@zju.edu.cn](mailto:pinglu@zju.edu.cn); [orgwyg@zju.edu.cn](mailto:orgwyg@zju.edu.cn)

## Table of Contents

1. General statement
2. Synthesis of the  $\pi$ -extended BTDs in butterfly-shaped D-A-D
3. **Figures S1-S10**  $^1\text{H}$  NMR and  $^{13}\text{C}$  NMR of compounds in butterfly shaped D-A-D
4. Synthesis of the  $\pi$ -extended BTDs in butterfly-shaped D-A-A
5. **Figures S11-S18**  $^1\text{H}$  NMR and  $^{13}\text{C}$  NMR of compounds in butterfly shaped D-A-A
6. Synthesis of the  $\pi$ -extended BTDs in linear-shaped D-A-D
7. Synthesis of the  $\pi$ -extended BTDs in linear-shaped D-A-A
8. **Figures S19-22**  $^1\text{H}$  NMR and  $^{13}\text{C}$  NMR of compounds in linear-shaped D-A-A
9. **Table S1** Crystallographic data of compounds in butterfly-shaped
10. **Figure S23** TGA analysis of compounds in butterfly-shaped
11. **Figure S24** TGA analysis of compounds in linear-shaped
12. **Figure S25** Solvent effect on absorption and emission of butterfly-shaped compounds
13. **Figure S26** Solvent effect on absorption and emission of linear-shaped compounds
14. **Table S2** Solvent effect on absorption and emission
15. **Table S3** Dipole moments of molecules in ground states and in excited states
16. **Figure S27** (a) Emission spectra of **2PMP-56** in aqueous THF solutions; (b) TEM image of **2PMP-56** in 95% water faction; (c) DLS analysis of of **2PMP-56** in 95% water faction
17. **Figure S28** Emission spectra of **PMP-5-BN-6** in aqueous THF solutions
18. **Figure S29** (a) Emission spectra of **2DMP-56** in aqueous THF solutions; (b) TEM image of **2DMP-56** in 95% water faction; (c) DLS analysis of of **2PMP-56** in 95% water faction
19. **Figure S30** (a) Emission spectra of **DMP-5-BN-6** in aqueous THF solutions; (b) TEM image of **DMP-5-BN-6** in 70%, 80%, 90%, and 95% water faction, respectively
20. **Figure S31** Emission spectra of butterfly-shaped compounds in crystals (a&b), in pristines (c), in films (d)
21. **Figure S32** Emission spectra of linear-shaped compounds in pristines (a), in films (b).
22. **Figure S33** Emission spectra of **2Ph-56** before and after grinding (left), photos of **2Ph-56** before and after grinding (right)
23. **Figure S34** Emission spectra (a) and XRD diffractions (b) of **2Ph-47** before and after grinding; (c) Photos under UV lamp
24. **Figure S35** Emission spectra of **2PMP-56**, **2PMP-47**, **PMP-5-BN-6** and **PMP-4-BN-7** before and after grinding (left); photos under UV lamp (right)
25. **Figure S36** Emission spectra (a) and XRD diffractions (b) of **2DMP-56** before and after grinding/fuming; (c) Reversible changes of emission intensities of **2DMP-56** by grinding and fuming; (d) Photos under UV lamp
26. **Figure S37** Emission spectra (a) and XRD diffractions (b) of **2DMP-47** before and after grinding/fuming; (c) Photos under UV lamp
27. **Figure S38** Emission spectra (a) and XRD diffractions (b) of **DMP-5-BN-6** before and after grinding/fuming; (c) Reversible changes of emission intensities of **DMP-5-BN-6** by grinding and fuming; (d) Photos under UV lamp
28. **Figure S39** Emission spectra (a) and XRD diffractions (b) of **DMP-4-BN-7** before and after grinding/fuming; (c) Photos under UV lamp
29. **Figure S40** Emission spectra of **2TPA-56** (a) and **2TPA-47** (c) before and after grinding; photos of **2TPA-56** (b) and **2TPA-47** (d) before and after grinding under UV lamp

30. **Figure S41** Cyclic voltammograms of butterfly-shaped compounds
31. **Table S4** Electrochemical properties and theoretical calculations
32. **Figure S42** EL a) Spectrum of **DMAP-5-BN-6** based device operating at a voltage of 7 v. Inset: Image of device; b) Current-density-voltage (L-J-V) characteristics
33. **Figure S43** EL a) Spectrum of **2TPA-56** based device operating at a voltage of 7 v. Inset: Image of device; b) Current-density-voltage (L-J-V) characteristics
34. **Table S5** Performance of OLED devices

## 1. General statement

Unless otherwise mentioned, solvents and reagents were purchased from commercial sources and used as received. For the purpose of the measurement of photophysical properties, THF was distilled from sodium. Melting points were measured with a micro melting point apparatus. Infrared spectra were obtained with an FTIR spectrometer. NMR spectra were operated at 400 or 500 MHz for  $^1\text{H}$  NMR, 100 or 125 MHz for  $^{13}\text{C}$  NMR. All the NMR spectra were recorded at room temperature. Chemical shifts were quoted in parts per million (ppm) referenced to the appropriate solvent peak or 0.0 ppm for tetramethylsilane. The following abbreviations are used to describe peak patterns as appropriate: s = singlet, d = doublet, t = triplet, q = quartet, m = multiplet. Coupling constants  $J$  were reported in hertz. High-resolution mass spectra (HRMS) data were obtained with electron ionization time-of-flight (EI-TOF) or electron spray ionization time-of-flight (ESI-TOF) mass spectrometer. Flash column chromatography was performed employing 300-400 mesh silica gel. Thin layer chromatography (TLC) was performed on silica gel HSGF254. The absorption spectra were measured using UV-vis spectrometer. FL spectra were recorded on a fluorospectro photometer with a xenon lamp excitation source. Cyclic voltammetry measurements were performed on an electrochemical analyzer in solution at room temperature. Thermogravimetric Analysis (TGA) was obtained with a thermal analyzer at heating and cooling rates of 10 K/min under an  $\text{N}_2$  atmosphere.

Device Fabrication: Before device fabrication, the ITO glass substrates were pre-cleaned carefully. Then hole transporting material PEDOT:PSS was made with 4000 r/s for 45 s and annealing 25 min at 150 °C. Emission Layer was prepared in chlorobenzene with 30 mg/mL. Then it was made with 3000 r/s for 45 s and annealing 25 min at 50 °C, annealing 25 min at 150 °C for PVK. After the organic film deposition, 30 or 35 nm of TPBi, 1 nm of LiF and 50 nm of aluminum were thermally evaporated onto the organic surface.

## 2. Synthesis of the $\pi$ -extended BTDs in butterfly-shaped D-A-D.

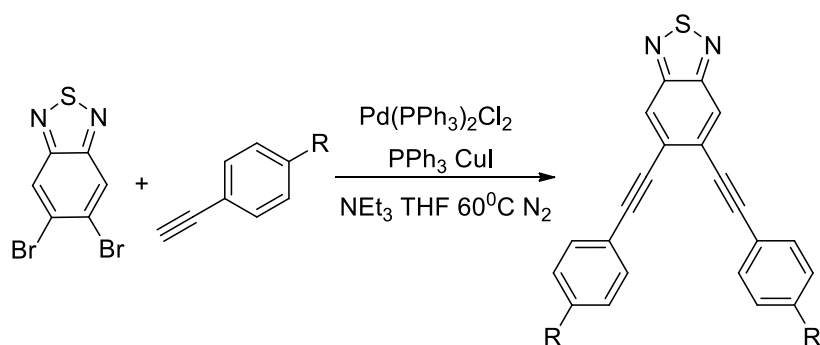

To a 50 mL round bottom flask with magnetic stir bar was added 5,6-dibromobenzo[c][1,2,5]thiadiazole (146 mg, 0.5 mmol), phenylacetylene (143 mg, 1.4 mmol), Pd(PPh<sub>3</sub>)<sub>2</sub>Cl<sub>2</sub> (35mg, 0.05 mmol), PPh<sub>3</sub> (26mg, 0.1 mmol), CuI (9.5mg, 0.05mmol), triethylamine (0.6 mL) and was suspended in tetrahydrofuran (10 mL) at 60 °C under N<sub>2</sub> for 12h. After cooling to room temperature, the solvent was removed via vacuum. Purification of the residue by flash chromatography on silica gel using DCM/HEX as eluent afforded the desired product.

**Compound 2Ph-56<sup>(1)</sup>:** Green solid, yield 71%, mp 158.2-158.8 °C. <sup>1</sup>H NMR (400 MHz, CDCl<sub>3</sub>): δ (ppm) 8.21 (s, 2H), 7.60-7.62 (m, 4H), 7.36-7.42 (m, 6H); <sup>13</sup>C NMR (100 MHz, CDCl<sub>3</sub>): δ (ppm) 153.9, 131.9, 129.0, 128.5, 126.7, 124.2, 122.6, 96.1, 87.3. HRMS (EI-TOF): calcd. for C<sub>22</sub>H<sub>12</sub>N<sub>2</sub>S [M<sup>+</sup>], 336.0721; found: 336.0719. IR: 3437, 2916, 2852, 2206, 1735, 1654, 1618, 1560, 1496, 1313, 1069.

**Compound 2PMP-56:** Green solid, yield 81%, mp 152.3-152.6 °C. <sup>1</sup>H NMR (400 MHz, CDCl<sub>3</sub>): δ (ppm) 8.16 (s, 2H), 7.55 (d, *J* = 9.2 Hz, 4H), 6.90 (d, *J* = 8.8 Hz, 4H), 3.86 (s, 6H); <sup>13</sup>C NMR (100 MHz, CDCl<sub>3</sub>): δ (ppm) 160.2, 153.9, 133.4, 127.1, 123.7, 114.8, 114.2, 96.3, 86.4, 55.4; HRMS (EI-TOF): calcd. for C<sub>24</sub>H<sub>16</sub>N<sub>2</sub>O<sub>2</sub>S [M<sup>+</sup>], 396.0932; found: 396.0935. IR: 3438, 2925, 2959, 2200, 1654, 1604, 1560, 1513, 1291, 1252, 1175, 1031.

**Compound 2DMP-56:** Red solid, yield 64%, mp 215.2-215.9 °C. <sup>1</sup>H NMR (400 MHz, CDCl<sub>3</sub>): δ (ppm) 8.11 (s, 2H), 7.51 (d, *J* = 9.2Hz, 4H), 6.68 (d, *J* = 8.8 Hz, 4H), 3.03 (s, 12H); <sup>13</sup>C NMR (100 MHz, CDCl<sub>3</sub>): δ (ppm) 153.9, 150.5, 133.2, 127.6, 122.9, 111.8, 109.4, 98.0, 86.2, 40.2; HRMS (EI-TOF): calcd. for C<sub>26</sub>H<sub>22</sub>N<sub>4</sub>S [M<sup>+</sup>], 422.1565; found: 422.1567. IR: 3437, 2923, 2852, 2194, 1605, 1595, 1529, 1438, 1369, 1233, 1188, 1115.

**Compound 2TPA-56:** Orange solid, yield 68%, mp 200.9-201.5 °C. <sup>1</sup>H NMR (400 MHz, CDCl<sub>3</sub>): δ (ppm) 8.15 (s, 2H), 7.43 (d, *J* = 8.8 Hz, 4H), 7.25-7.28 (m, 8H), 7.05-7.13 (m, 12H), 7.00 (d, *J* =

8.8 Hz, 4H);  $^{13}\text{C}$  NMR (100 MHz,  $\text{CDCl}_3$ ):  $\delta$  (ppm) 153.9, 148.6, 147.0, 132.8, 129.4, 127.1, 125.2, 123.8, 123.6, 121.8, 115.1, 96.8, 86.9; HRMS (EI-TOF): calcd. for  $\text{C}_{46}\text{H}_{30}\text{N}_4\text{S}$  [ $\text{M}^+$ ], 670.2191; found: 670.2197. IR: 3452, 2916, 2847, 2198, 1654, 1587, 1561, 1331, 1285, 1178.

**Compound 2POZ-56:** Orange solid, yield 63%, mp 208.5-209.0 °C.  $^1\text{H}$  NMR (400 MHz,  $\text{CD}_2\text{Cl}_2$ ):  $\delta$  (ppm) 8.30 (s, 2H), 7.86 (d,  $J = 8.4\text{Hz}$ , 4H), 7.40 (d,  $J = 8.4\text{Hz}$ , 4H), 6.56-6.69 (m, 12H), 5.97 (dd,  $J = 1.2\text{Hz}$ , 7.6Hz, 8.0Hz, 4H);  $^{13}\text{C}$  NMR (100 MHz,  $\text{CD}_2\text{Cl}_2$ ):  $\delta$  (ppm) 154.4, 144.3, 140.2, 134.9, 134.3, 131.6, 126.4, 125.1, 123.7, 123.2, 122.0, 115.8, 113.7, 95.3, 88.7; HRMS (EI-TOF): calcd. for  $\text{C}_{46}\text{H}_{26}\text{N}_4\text{O}_2\text{S}$  [ $\text{M}^+$ ], 698.1776; found: 698.1776. IR: 3451, 2916, 2843, 2206, 1654, 1625, 1512, 1486, 1329, 1293, 1274, 1205, 1043.

### 3. Figures S1-S10 $^1\text{H}$ NMR and $^{13}\text{NMR}$ of compounds in butterfly shaped D-A-D

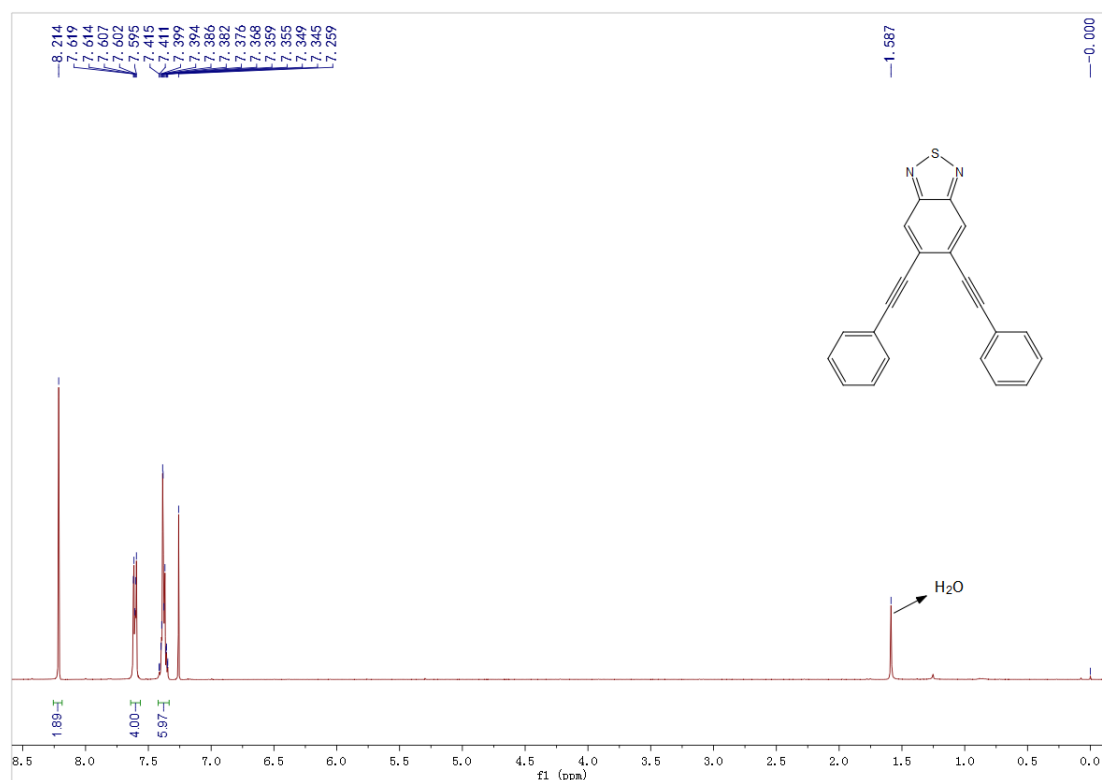

**Figure S1**  $^1\text{H}$  NMR of **2Ph-56** in  $\text{CDCl}_3$ .

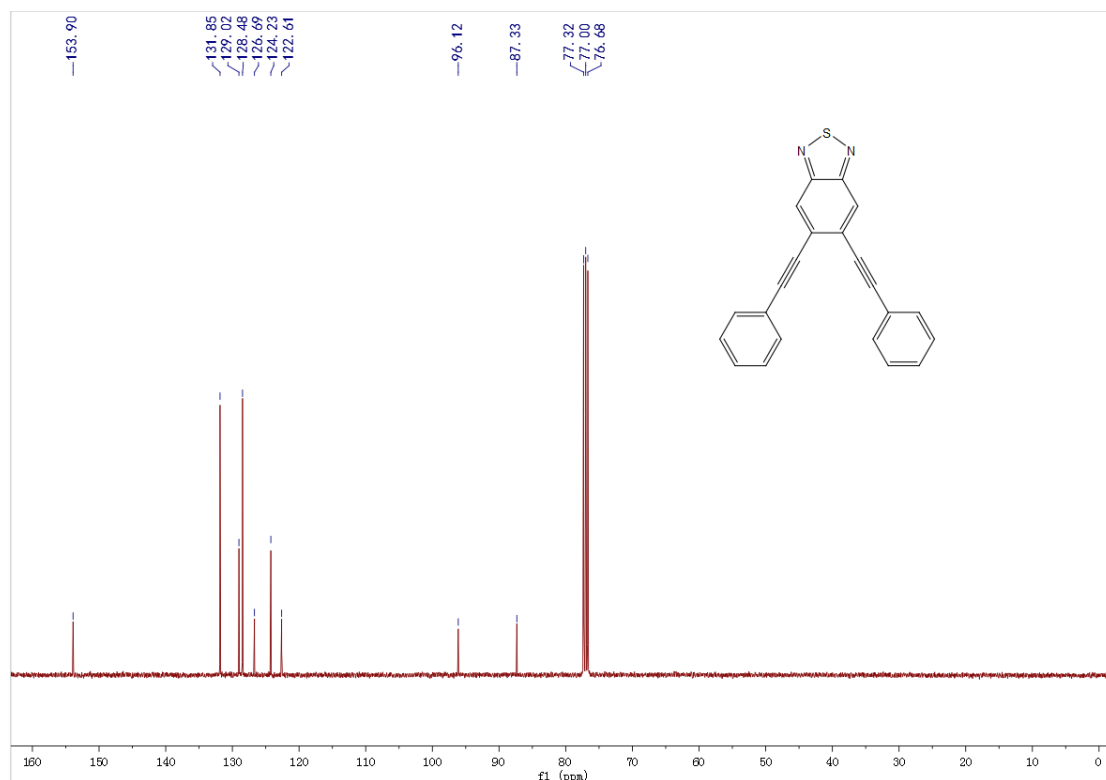

**Figure S2** <sup>13</sup>C NMR of 2Ph-56 in CDCl<sub>3</sub>.

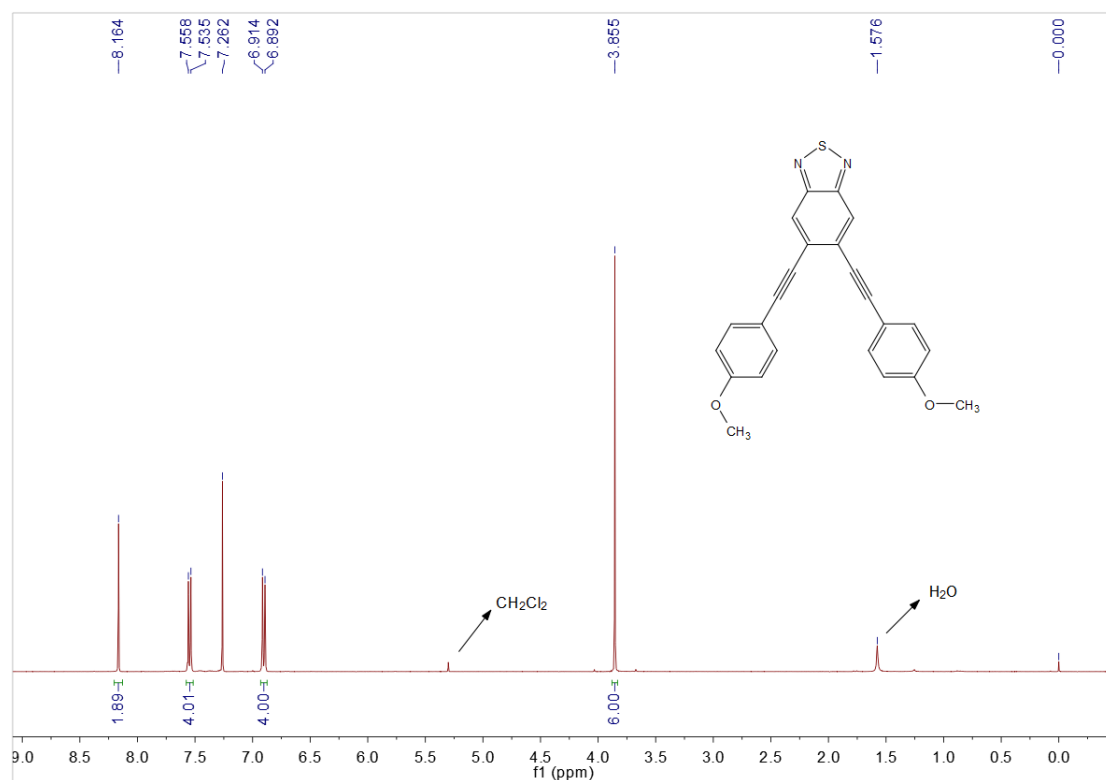

**Figure S3** <sup>1</sup>H NMR of 2PMP-56 in CDCl<sub>3</sub>.

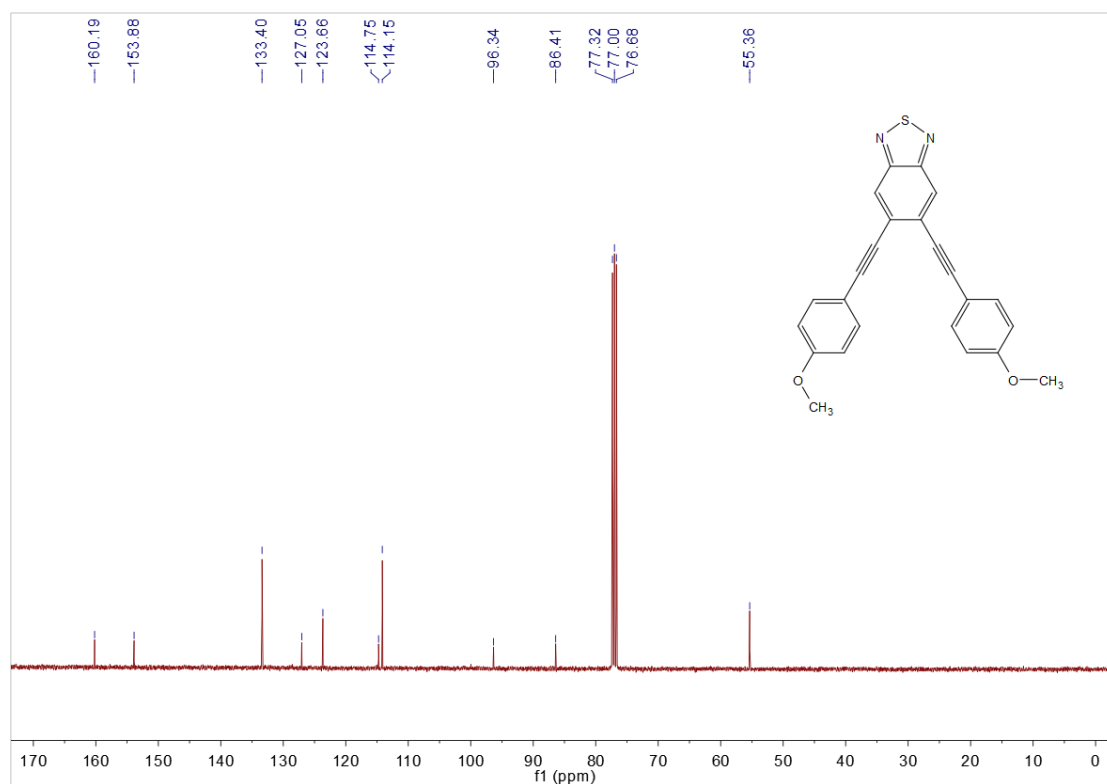

**Figure S4** <sup>13</sup>C NMR of **2PMP-56** in CDCl<sub>3</sub>.

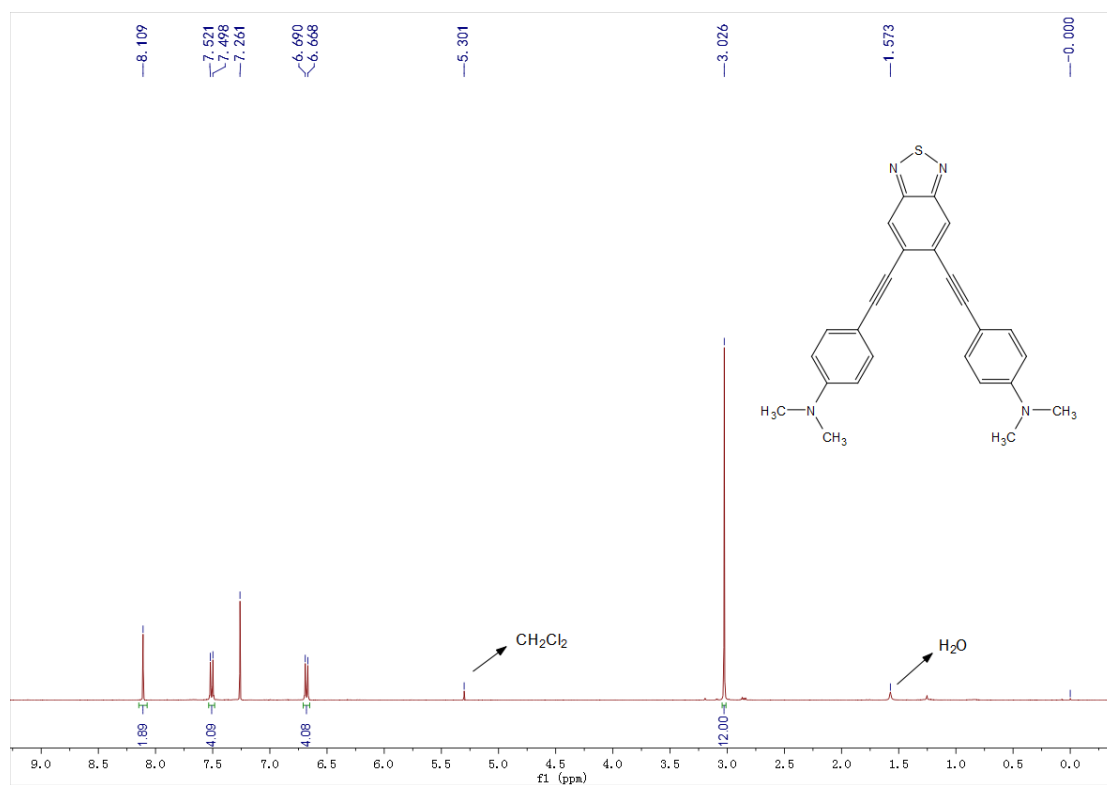

**Figure S5** <sup>1</sup>H NMR of **2DMP-56** in CDCl<sub>3</sub>



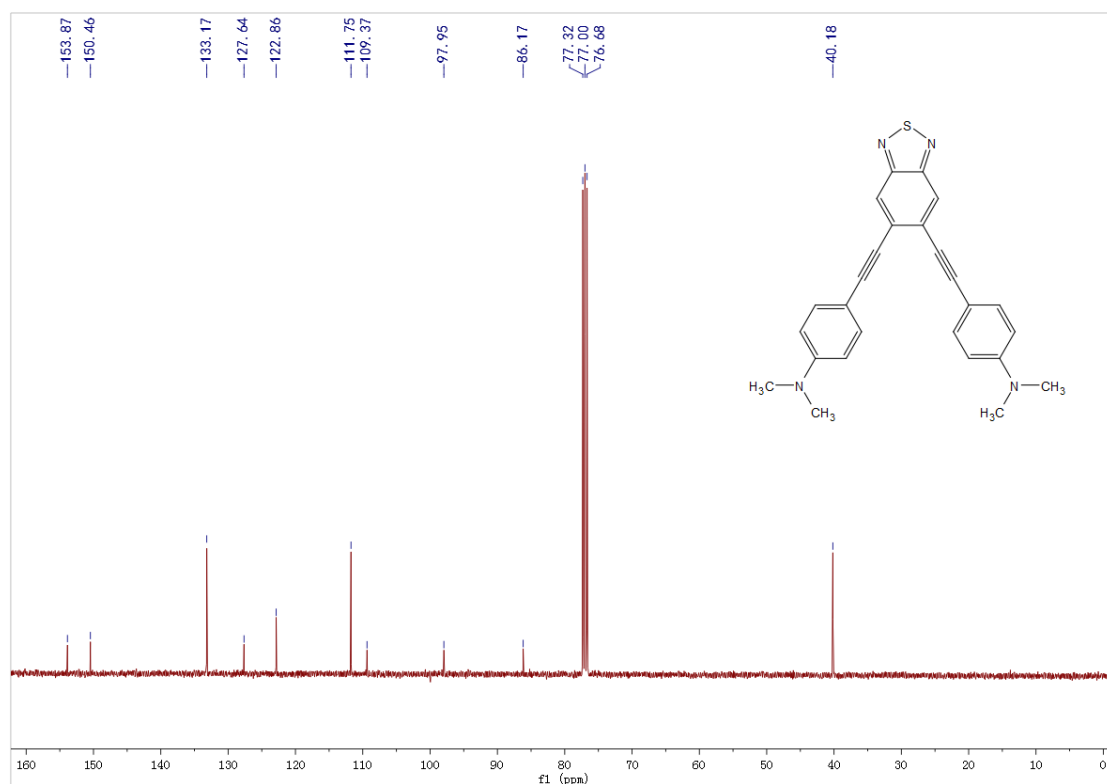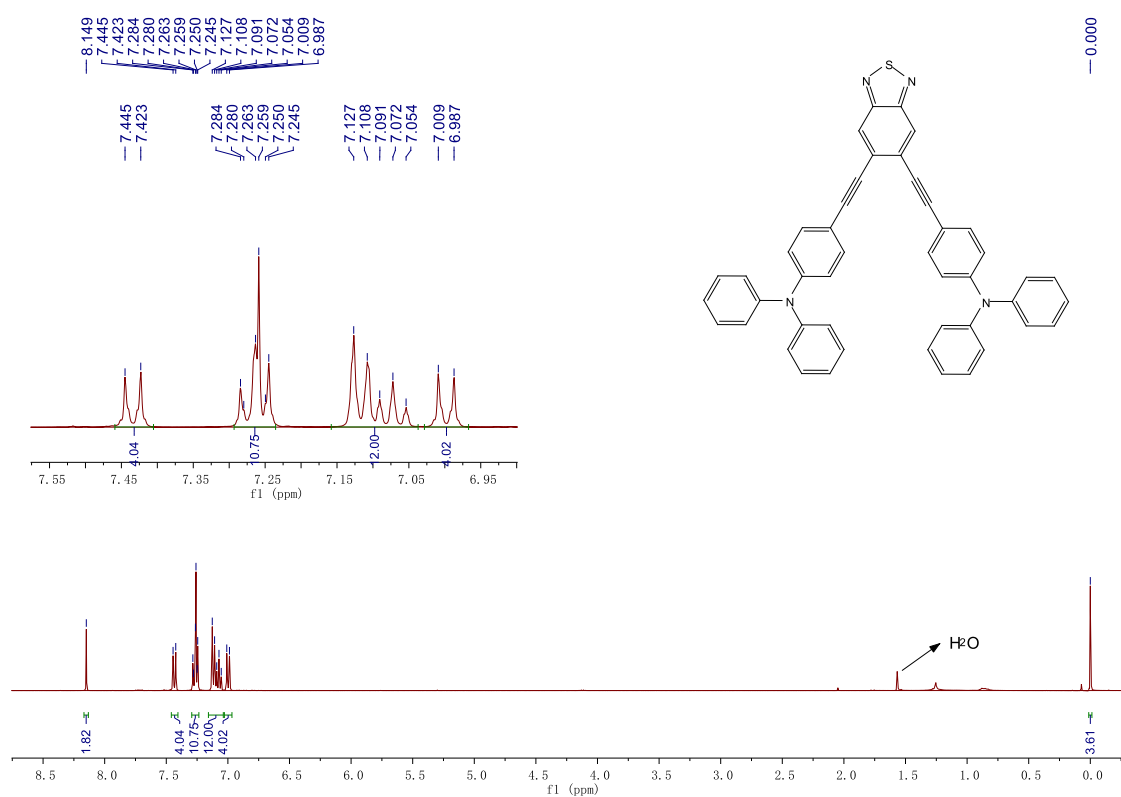

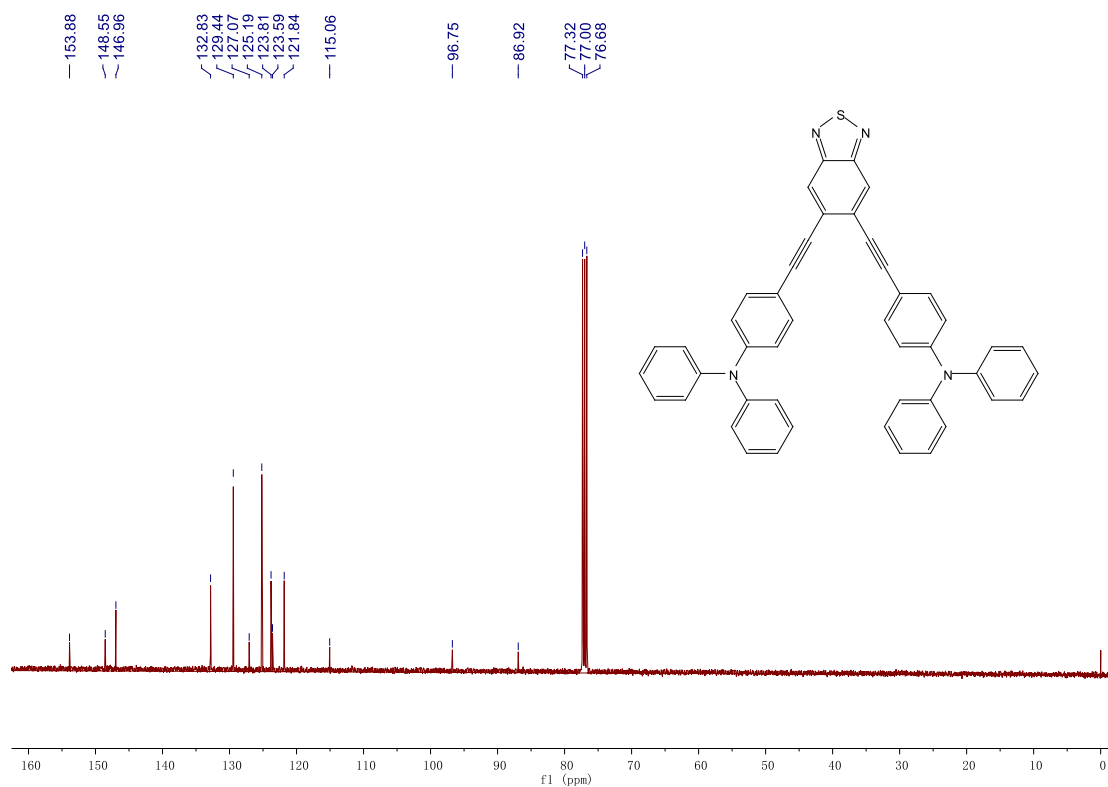

Figure S8 <sup>13</sup>C NMR of 2TPA-56 in CDCl<sub>3</sub>.

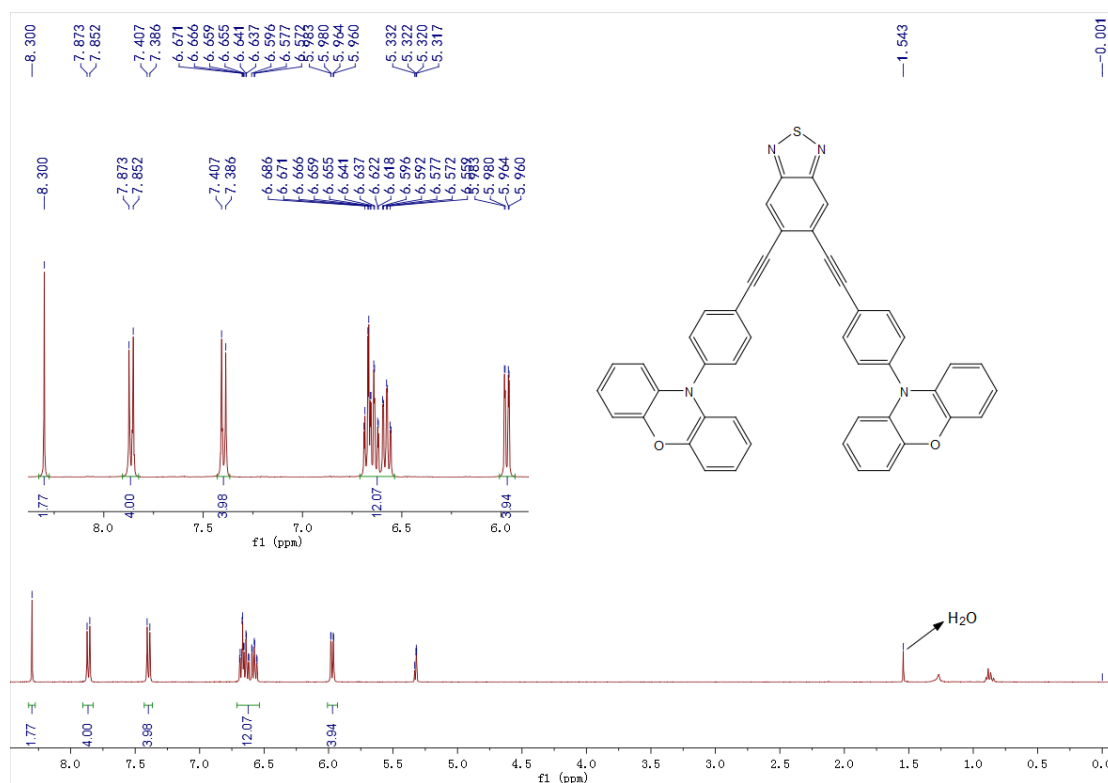

Figure S9 <sup>1</sup>H NMR of 2POZ-56 in CD<sub>2</sub>Cl<sub>2</sub>

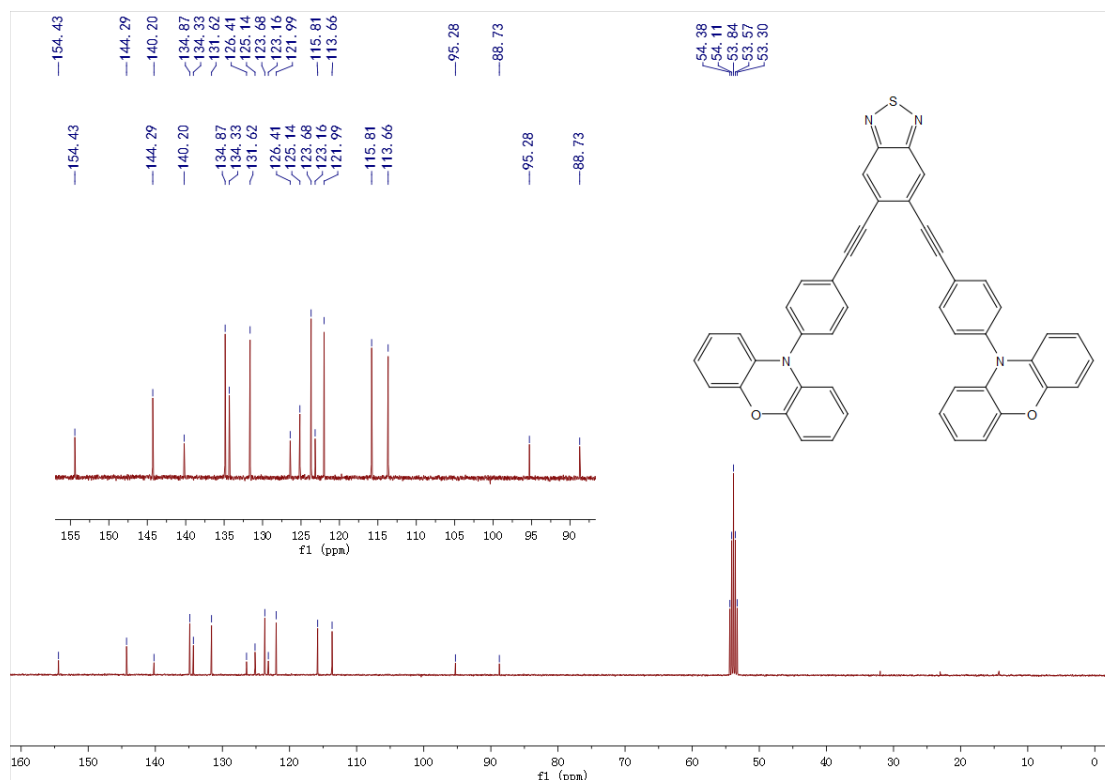

**Figure S10**  $^{13}\text{C}$  NMR of **2POZ-56** in  $\text{CD}_2\text{Cl}_2$

#### 4. Synthesis of the $\pi$ -extended BTDs in butterfly-shaped D-A-A.

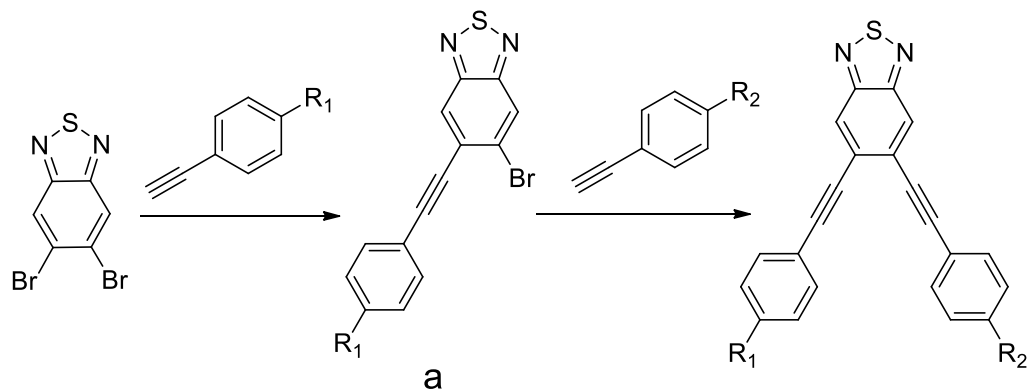

To a 50 mL round bottom flask with magnetic stir bar was added 5,6-dibromobenzo[c][1,2,5]thiadiazole (146 mg, 0.5 mmol), electron-rich alkyne (0.7 mmol),  $\text{Pd}(\text{PPh}_3)_2\text{Cl}_2$  (35mg, 0.05 mmol),  $\text{PPh}_3$  (26mg, 0.1 mmol),  $\text{CuI}$  (9.5 mg, 0.05 mmol), triethylamine (0.6 mL) and was suspended in tetrahydrofuran (10 mL) at  $60^\circ\text{C}$  under  $\text{N}_2$  for 12h. After cooling to room temperature, the solvent was removed via vacuum. Purification of the residue by flash chromatography on silica gel using  $\text{DCM}/\text{HEX}$  as eluent afforded the desired intermediate **a**.

To a 50 mL round bottom flask with magnetic stir bar was added

5,6-dibromobenzo[c][1,2,5]thiadiazole (146 mg, 0.5 mmol), electron-deficient alkyne (0.7 mmol), Pd(PPh<sub>3</sub>)<sub>2</sub>Cl<sub>2</sub> (35mg, 0.05 mmol), PPh<sub>3</sub> (26mg, 0.1 mmol), CuI (9.5 mg, 0.05 mmol), triethylamine (0.6 mL) and was suspended in tetrahydrofuran (10 mL) at 60 °C under N<sub>2</sub> for 12h. After cooling to room temperature, the solvent was removed via vacuum. Purification of the residue by flash chromatography on silica gel using DCM/HEX as eluent afforded the desired product.

**Compound PMP-5-Br-6:** Green solid, yield 82%. mp 168.0-168.4 °C <sup>1</sup>H NMR (400 MHz, CDCl<sub>3</sub>): δ (ppm) 8.34 (s, 1 H), 8.19 (s, 1H), 7.57(d, *J* = 8.8 Hz, 2H), 6.93 (d, *J* = 8.8 Hz, 2H), 3.86 (s, 3H); <sup>13</sup>C NMR (100 MHz, CDCl<sub>3</sub>): δ (ppm) 160.4, 154.2, 153.4, 133.4, 127.3, 127.1, 124.3, 124.1, 114.2, 100.0, 97.3, 86.4, 55.4. HRMS (ESI-TOF): calcd. for C<sub>15</sub>H<sub>10</sub>BrN<sub>2</sub>OS [M+H<sup>+</sup>], 344.9697; found: 344.9670. IR: 3437, 2916, 2847, 2200, 1607, 1577, 1534, 1482, 1364, 1179, 1168.

**Compound PMP-5-BN-6:** Green solid, yield 74%, mp 213.1-213.6 °C <sup>1</sup>H NMR (400 MHz, CDCl<sub>3</sub>): δ (ppm) 8.23 (s, 1 H), 8.19 (s, 1H), 7.67 (s, 4H), 7.51 (d, *J* = 8.8 Hz, 2H), 6.91 (d, *J* = 8.8 Hz, 2H), 3.86 (s, 3H); <sup>13</sup>C NMR (100 MHz, CDCl<sub>3</sub>): δ (ppm) 160.4, 154.2, 153.5, 133.3, 132.3, 132.2, 127.5, 126.8, 125.5, 124.9, 124.0, 118.3, 114.4, 114.2, 112.2, 96.6, 93.7, 91.5, 85.9, 55.4; HRMS (EI-TOF): calcd. for C<sub>24</sub>H<sub>13</sub>N<sub>3</sub>OS [M<sup>+</sup>], 391.0779; found: 391.0779. IR: 3450, 2916, 2847, 2215, 1654, 1560, 1512, 1249, 1169, 1021.

**Compound DMAP-5-Br-6:** Red solid, yield 81%. mp 145.0-145.4 °C. <sup>1</sup>H NMR (400 MHz, CDCl<sub>3</sub>): δ (ppm) 8.31 (s, 1 H), 8.14 (s, 1H), 7.50(d, *J* = 8.8 Hz, 2H), 6.68(d, *J* = 8.8 Hz, 2H), 3.03 (s, 6H); <sup>13</sup>C NMR (100 MHz, CDCl<sub>3</sub>): δ (ppm) 154.0, 153.5, 150.7, 133.1, 127.7, 127.6, 124.2, 123.3, 111.7, 108.6, 99.2, 86.1, 40.1. HRMS (ESI-TOF): calcd. for C<sub>16</sub>H<sub>13</sub>BrN<sub>3</sub>S [M+H<sup>+</sup>], 358.0014; found: 357.9991. IR: 3433, 2919, 2843, 2202, 2120, 1611, 1586, 1522, 1366, 1189, 1113, 1064, 994.

**Compound DMAP-5-BN-6:** Red solid, yield 72%, mp 206.5-207.0 °C. <sup>1</sup>H NMR (400 MHz, CDCl<sub>3</sub>): δ (ppm) 8.21 (s, 1 H), 8.16 (s, 1H), 7.66-7.71 (m, 4H), 7.43 (d, *J* = 8.8Hz, 2H), 6.67 (d, *J* = 8.4 Hz, 2H), 3.04 (s, 6H); <sup>13</sup>C NMR (100 MHz, CDCl<sub>3</sub>): δ (ppm) 154.4, 153.4, 150.6, 133.0, 132.3, 132.2, 127.4, 125.7, 124.7, 123.3, 118.4, 112.1, 111.7, 108.7, 98.5, 93.6, 91.8, 85.6, 40.1; HRMS (EI-TOF): calcd. for C<sub>25</sub>H<sub>16</sub>N<sub>4</sub>S [M<sup>+</sup>], 404.1096; found: 404.1099. IR: 3451, 3095, 2962, 2227, 2197, 1609, 1591, 1526, 1366, 1191, 1116, 1087.

5. Figures S11-S18  $^1\text{H}$  NMR and  $^{13}\text{C}$  NMR of compounds in butterfly shaped  
D-A-A

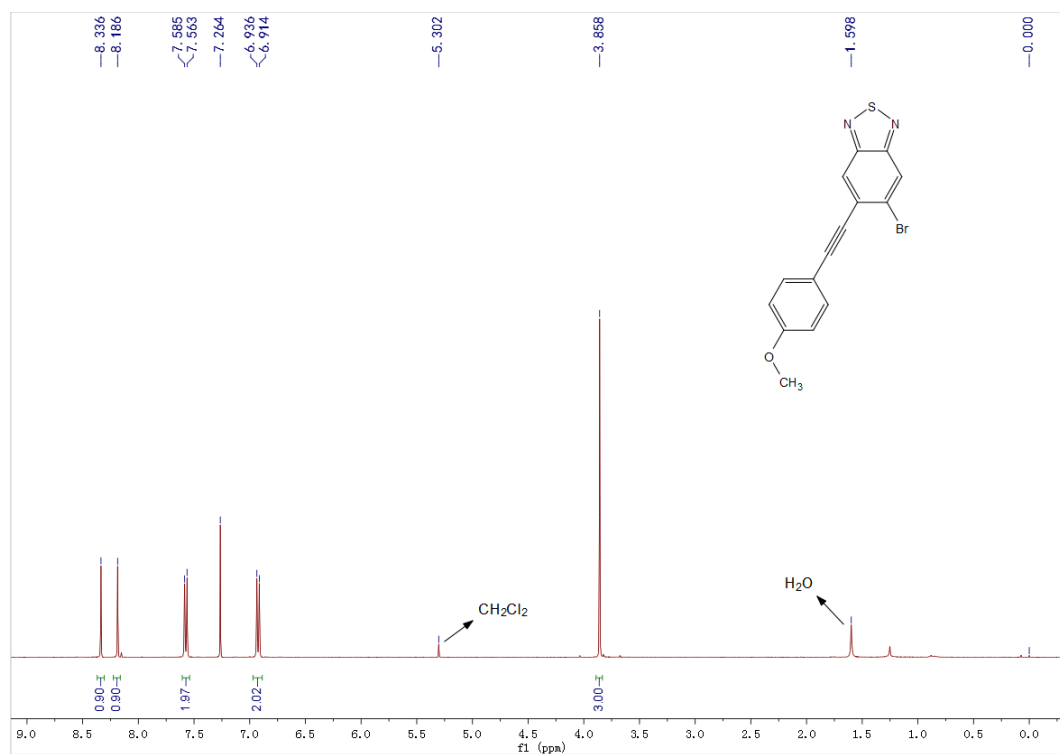

Figure S11  $^1\text{H}$  NMR of PMP-5-Br-6 in  $\text{CDCl}_3$

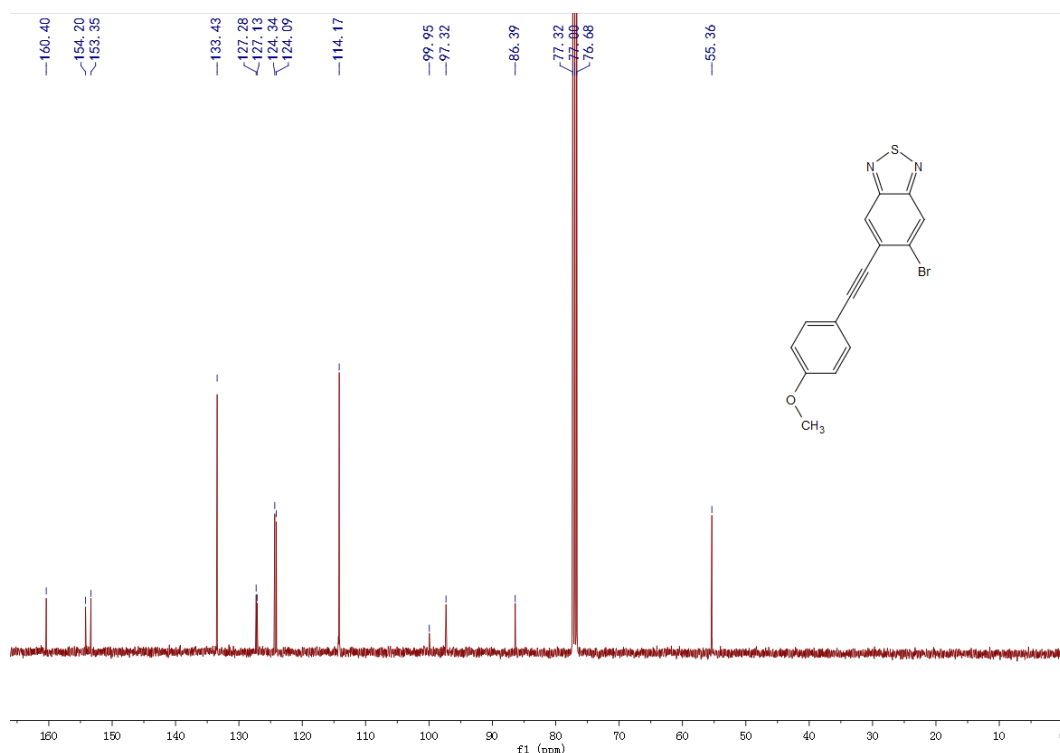

**Figure S12**  $^{13}\text{C}$  NMR of **PMP-5-Br-6** in  $\text{CDCl}_3$

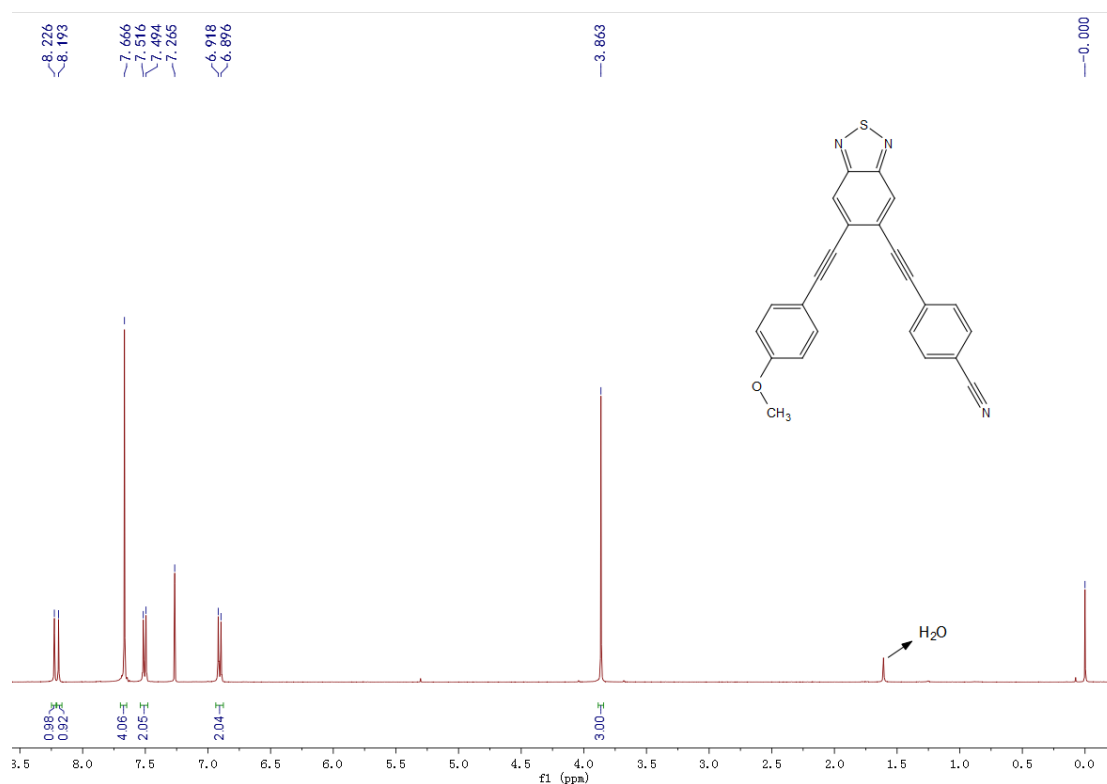

**Figure S13**  $^1\text{H}$  NMR of **PMP-5-BN-6** in  $\text{CDCl}_3$

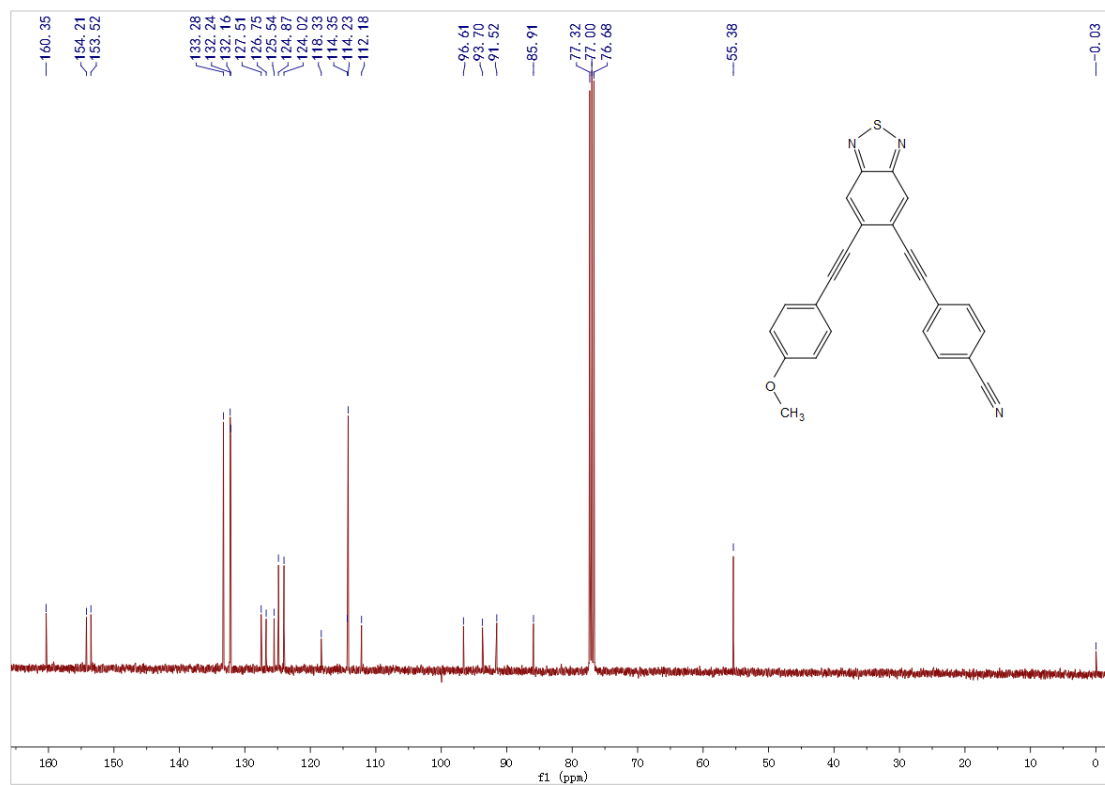

**Figure S14**  $^{13}\text{C}$  NMR of **PMP-5-BN-6** in  $\text{CDCl}_3$

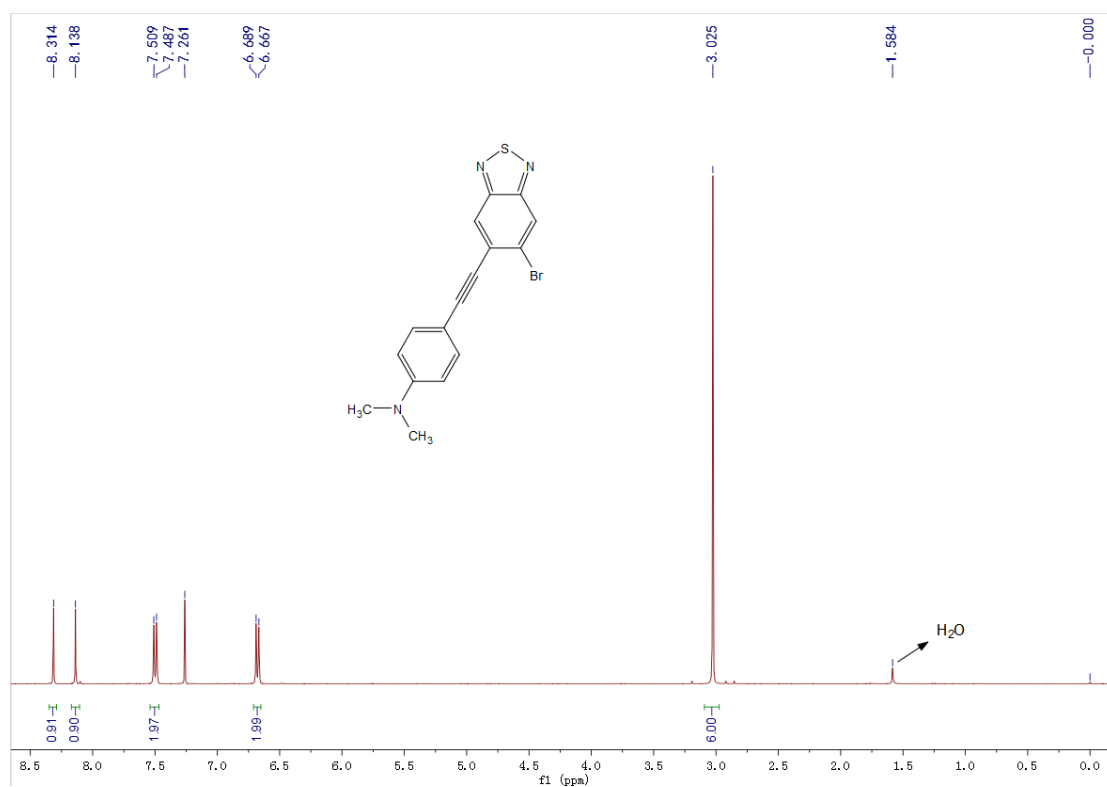

**Figure S15**  $^1\text{H}$  NMR of **DMAP-5-Br-6** in  $\text{CDCl}_3$

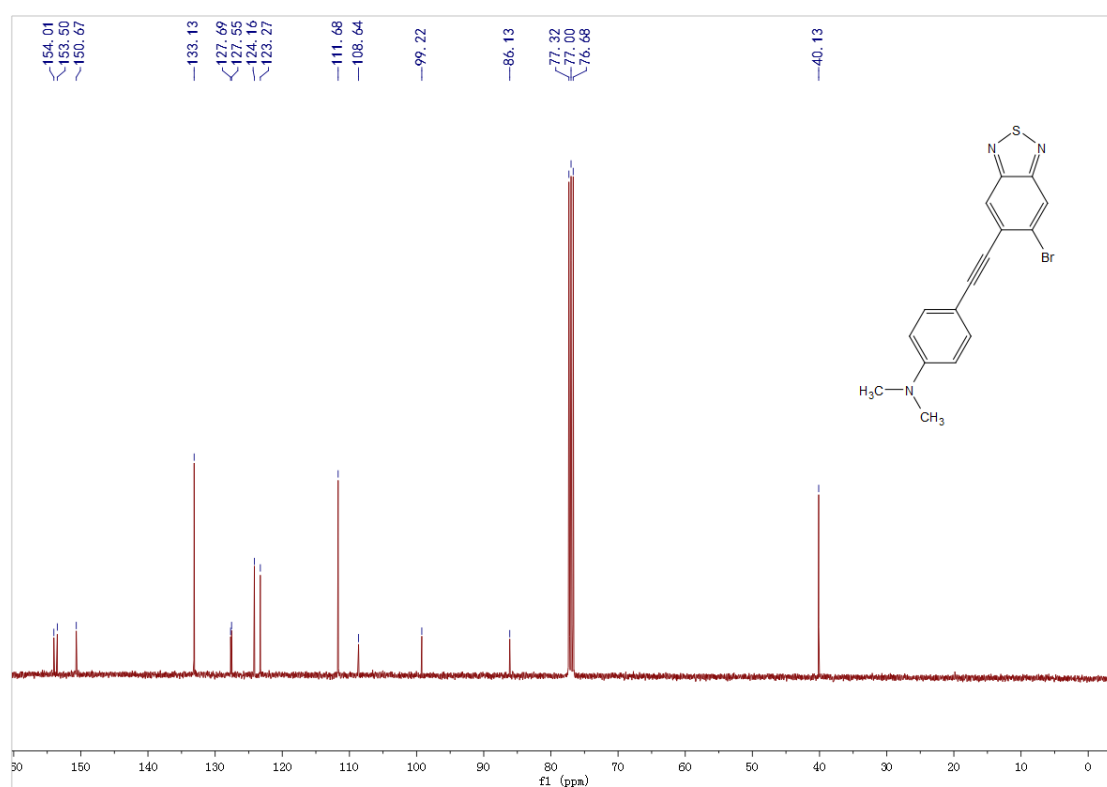

**Figure S16**  $^{13}\text{C}$  NMR of **DMAP-5-Br-6** in  $\text{CDCl}_3$

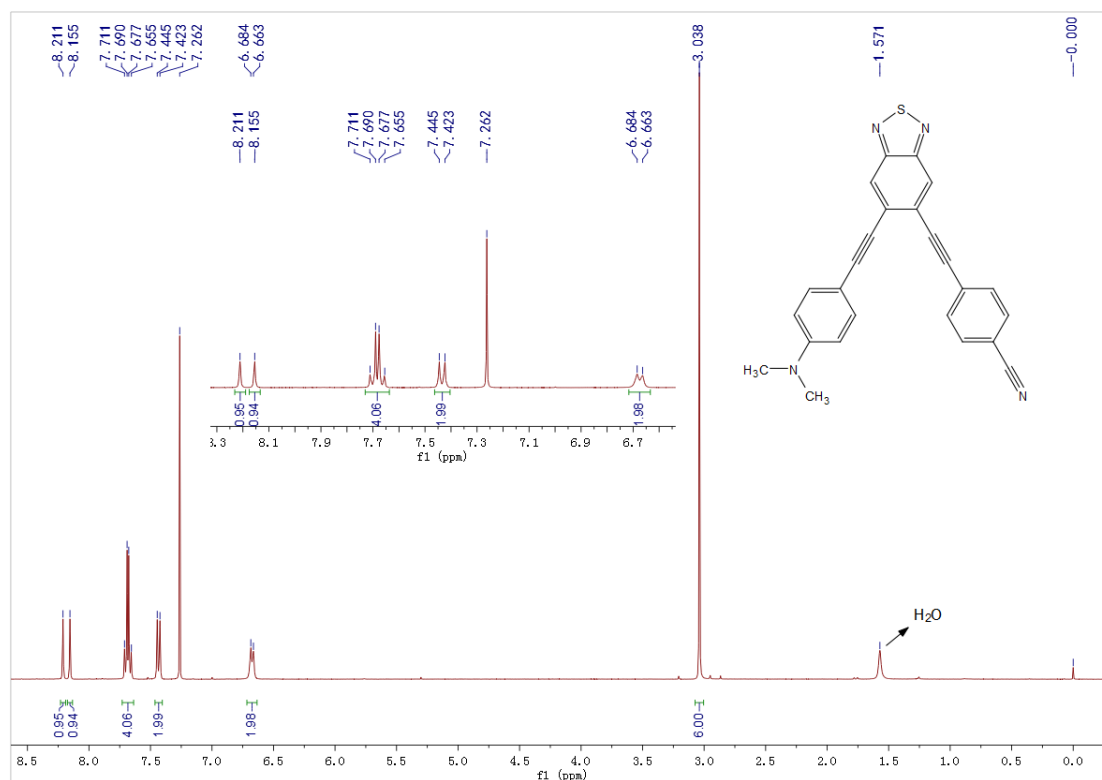

**Figure S17** <sup>1</sup>H NMR of DMAP-5-BN-6 in CDCl<sub>3</sub>

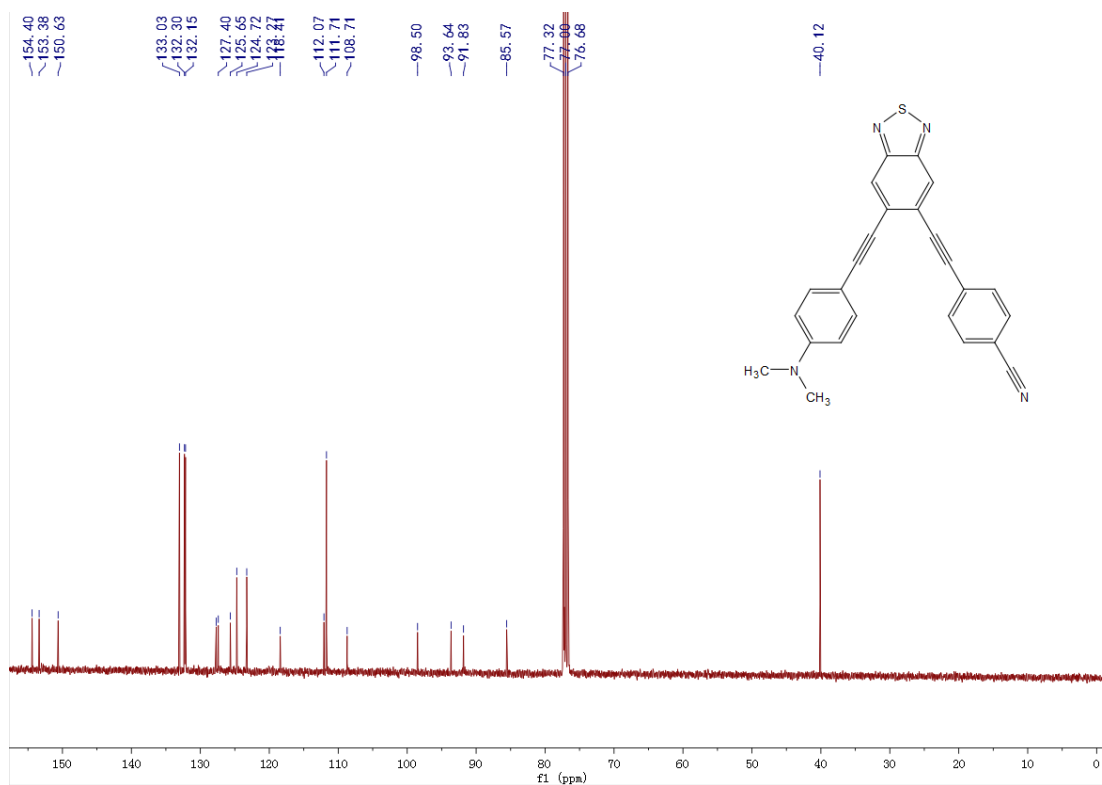

**Figure S18** <sup>13</sup>C NMR of DMAP-5-BN-6 in CDCl<sub>3</sub>



## 6. Synthesis of the $\pi$ -extended BTDs in linear-shaped D-A-D

D-A-D Linear-shaped compounds was synthesized according to previous literature<sup>[2-3]</sup>.

**Compound 2Ph-47<sup>[2]</sup>**: green solid, yield 76%. <sup>1</sup>H NMR (400 MHz, CDCl<sub>3</sub>):  $\delta$  (ppm) 7.80 (s, 2H), 7.66-7.69 (m, 4H), 7.39-7.41 (m, 6H); <sup>13</sup>C NMR (100 MHz, CDCl<sub>3</sub>):  $\delta$  (ppm) 154.4, 132.4, 132.0, 129.1, 128.4, 122.5, 117.2, 97.5, 85.3.

**Compound 2PMP-47<sup>[2]</sup>**: orange solid, yield 77%. <sup>1</sup>H NMR (400 MHz, CDCl<sub>3</sub>):  $\delta$  (ppm) 7.75 (s, 2H), 7.61 (d,  $J$  = 8.8 Hz, 4H), 6.92(d,  $J$  = 8.8 Hz, 4H), 3.85 (s, 6H); <sup>13</sup>C NMR (100 MHz, CDCl<sub>3</sub>):  $\delta$  (ppm) 160.2, 154.4, 133.5, 132.1, 117.1, 114.6, 114.1, 97.6, 84.3, 55.3.

**Compound 2DMAP-47<sup>[2]</sup>**: red solid, yield 52%. <sup>1</sup>H NMR (400 MHz, CDCl<sub>3</sub>):  $\delta$  (ppm) 7.70 (s, 2H), 7.54 (d,  $J$  = 9.2Hz, 4H), 6.69 (d,  $J$  = 8.8 Hz, 4H), 3.02 (s, 12H); <sup>13</sup>C NMR (100 MHz, CDCl<sub>3</sub>):  $\delta$  (ppm) 154.5, 150.5, 133.2, 131.7, 117.0, 111.7, 109.2, 99.1, 84.2, 40.2.

**Compound 2TPA-47<sup>[3]</sup>**: red solid, yield 59%. <sup>1</sup>H NMR (400 MHz, CDCl<sub>3</sub>):  $\delta$  (ppm) 7.73 (s, 2H), 7.50 (d,  $J$  = 8.4Hz, 4H), 7.28-7.32 (m, 8H), 7.07-7.15 (m, 12H), 7.03 (d,  $J$  = 8.8Hz, 4H); <sup>13</sup>C NMR (100 MHz, CDCl<sub>3</sub>):  $\delta$  (ppm) 154.4, 148.6, 147.0, 133.0, 132.0, 129.4, 125.2, 123.8, 121.8, 117.0, 114.9, 98.1, 84.9.

## 7. Synthesis of the $\pi$ -extended BTDs in linear-shaped D-A-A.

The routes of the synthesis are same with  $\pi$ -extended BTDs in butterfly-shaped D-A-A.

**Compound PMP-4-Br-7<sup>[4]</sup>**: green solid, yield 46%. <sup>1</sup>H NMR (400 MHz, CDCl<sub>3</sub>):  $\delta$  (ppm) 7.83 (d,  $J$  = 7.6Hz 1H), 7.59-7.64 (m, 3H), 6.92 (d,  $J$  = 8.8 Hz, 2H), 3.85 (s, 3H); <sup>13</sup>C NMR (100 MHz, CDCl<sub>3</sub>):  $\delta$  (ppm) 160.3, 154.2, 153.1, 133.5, 132.4, 132.0, 117.1, 114.4, 114.1, 114.0, 97.2, 83.5, 55.3.

**Compound PMP-4-BN-7**: yellow solid, yield 69%. mp 221.9-222.5 °C <sup>1</sup>H NMR (400 MHz, CDCl<sub>3</sub>):  $\delta$  (ppm) 7.68-7.83 (m, 6H), 7.62 (d,  $J$  = 8.4Hz, 2H), 6.93 (d,  $J$  = 8.8 Hz, 2H), 3.86 (s, 3H); <sup>13</sup>C NMR (100 MHz, CDCl<sub>3</sub>):  $\delta$  (ppm) 160.4, 154.3, 154.2, 133.6, 133.2, 132.4, 132.1, 131.8, 127.4, 118.7, 118.4, 115.4, 114.3, 114.1, 112.2, 98.7, 94.9, 89.3, 84.2, 55.4. HRMS (ESI-TOF): calcd. for C<sub>24</sub>H<sub>14</sub>N<sub>3</sub>OS [M+H<sup>+</sup>], 392.0858; found: 392.0844. IR: 3452, 2925, 2228, 2210, 1654, 1617, 1605, 1561, 1512, 1296, 1254, 1025, 840.

**Compound DMAP-4-Br-7<sup>[4]</sup>**: red solid, yield 58%. <sup>1</sup>H NMR (400 MHz, CDCl<sub>3</sub>):  $\delta$  (ppm) 7.80 (d,  $J$  = 7.6Hz 1H), 7.59 (d,  $J$  = 7.6Hz, 1H), 7.53 (d,  $J$  = 8.4 Hz, 2H), 6.68 (d,  $J$  = 8.8Hz 2H); <sup>13</sup>C

NMR (100 MHz, CDCl<sub>3</sub>):  $\delta$  (ppm) 154.2, 153.1, 150.5, 133.2, 132.1, 131.7, 117.7, 113.1, 111.6, 108.8, 99.1, 83.2, 40.1.

**Compound DMAP-4-BN-7:** red solid, yield 42%. mp 272.8-273.7 °C <sup>1</sup>H NMR (500 MHz, CDCl<sub>3</sub>):  $\delta$  (ppm) 7.5(d, *J* = 7.5Hz 1H), 7.70-7.75 (m, 5H), 7.51 (d, *J* = 9Hz, 2H), 6.71 (d, *J* = 8.5Hz 2H), 3.03(s, 6H); <sup>13</sup>C NMR (100 MHz, CDCl<sub>3</sub>):  $\delta$  (ppm) 154.8, 151.3, 133.8, 133.6, 132.6, 131.4, 127.8, 119.6, 118.8, 115.0, 112.5, 112.1, 108.7, 100.8, 94.9, 89.9, 84.6, 40.3. HRMS (ESI-TOF): calcd. for C<sub>25</sub>H<sub>17</sub>N<sub>4</sub>S [M+H<sup>+</sup>], 405.1174; found: 405.1167. IR: 3453, 2920, 2804, 2222, 2193, 1604, 1560, 1541, 1523, 1482, 1356, 1182, 1046.

## 8. Figures S19-S22 <sup>1</sup>H NMR and <sup>13</sup>C NMR of compounds in liner-shaped D-A-A.

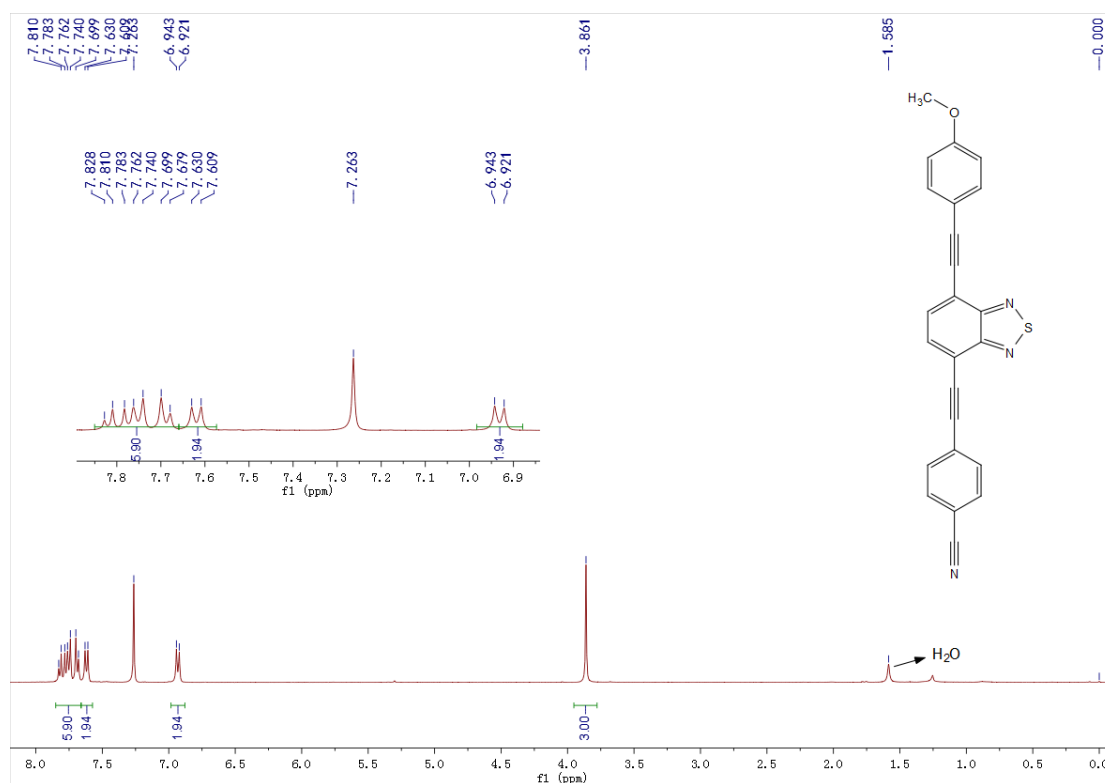

Figure S19 <sup>1</sup>H NMR of PMP-4-BN-7 in CDCl<sub>3</sub>

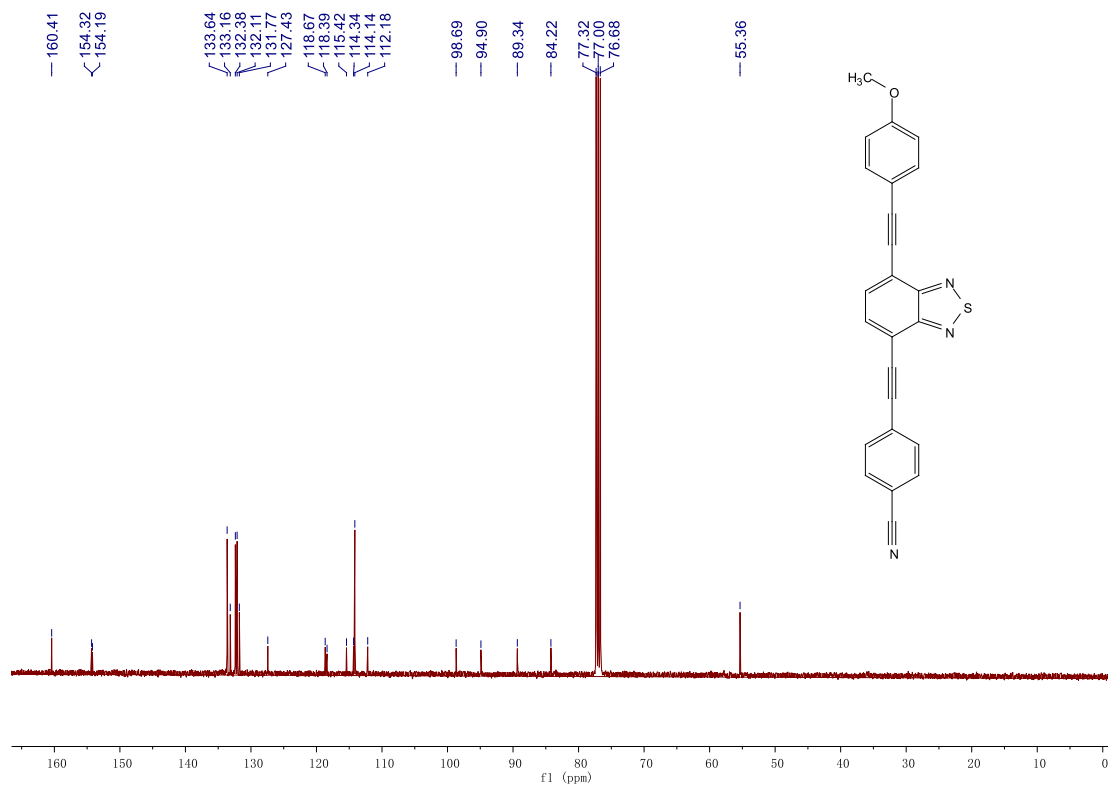

Figure S20  $^{13}\text{C}$  NMR of PMP-4-BN-7 in  $\text{CDCl}_3$

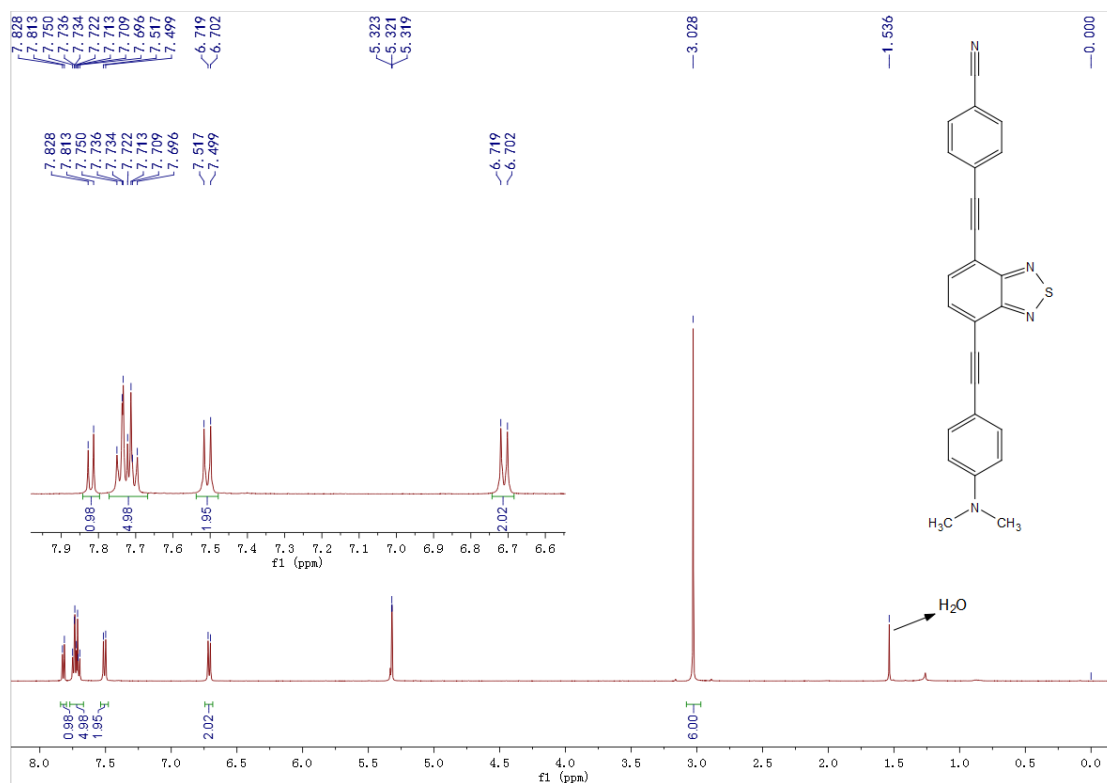

Figure S21  $^1\text{H}$  NMR of DMAP-4-BN-7 in  $\text{CD}_2\text{Cl}_2$

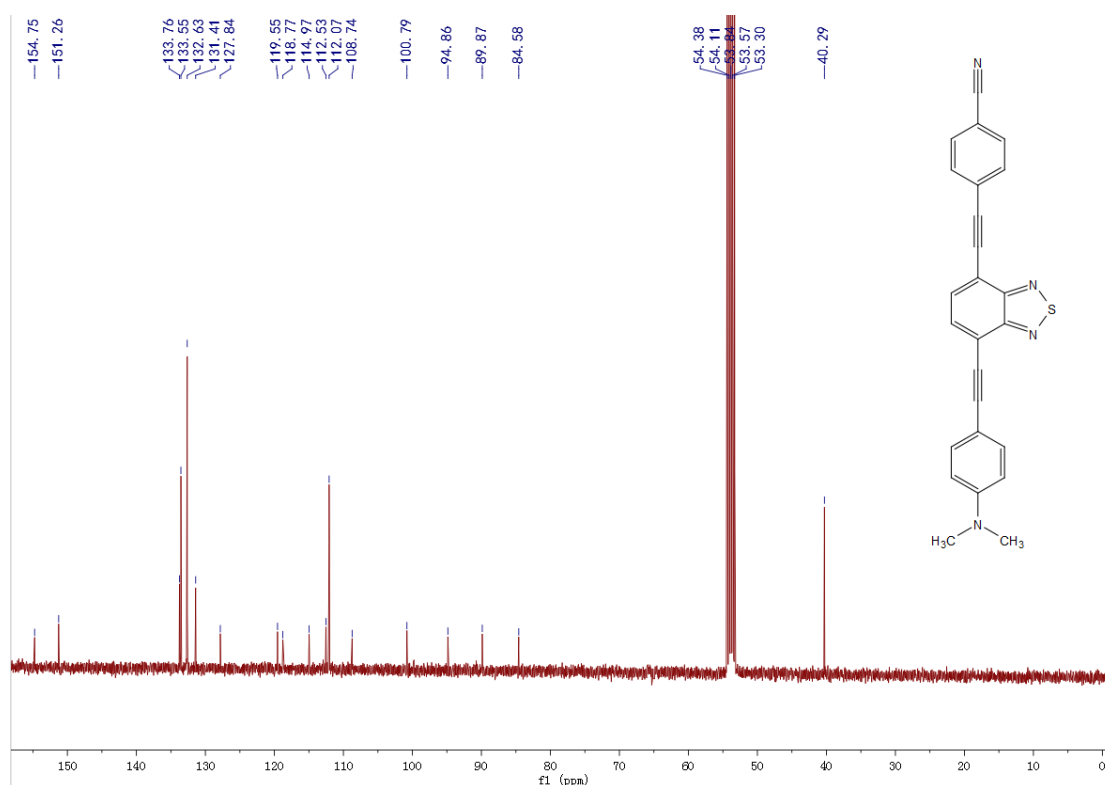

Figure S22 <sup>13</sup>C NMR of DMAP-4-BN-7 in CD<sub>2</sub>Cl<sub>2</sub>

Table S1 Crystallographic data of compounds in butterfly-shaped

| crystals                | 2PMP-56                                                         | 2DMAP-56                                         | 2TPA-56                                          | 2POZ-56(I)                                                      | 2POZ-56(II)                                                     | PMP-5-BN-6                                        | DMAP-5-BN-6                                      |
|-------------------------|-----------------------------------------------------------------|--------------------------------------------------|--------------------------------------------------|-----------------------------------------------------------------|-----------------------------------------------------------------|---------------------------------------------------|--------------------------------------------------|
| Formula                 | C <sub>24</sub> H <sub>16</sub> N <sub>2</sub> O <sub>2</sub> S | C <sub>26</sub> H <sub>22</sub> N <sub>4</sub> S | C <sub>46</sub> H <sub>30</sub> N <sub>4</sub> S | C <sub>46</sub> H <sub>30</sub> N <sub>4</sub> O <sub>2</sub> S | C <sub>46</sub> H <sub>30</sub> N <sub>4</sub> O <sub>2</sub> S | C <sub>24</sub> H <sub>13</sub> N <sub>3</sub> OS | C <sub>25</sub> H <sub>16</sub> N <sub>4</sub> S |
| CCDC                    | 1850546                                                         | 1850547                                          | 1850549                                          | 1887113                                                         | 1887112                                                         | 1850548                                           | 1850544                                          |
| a [Å]                   | 8.7103                                                          | 7.6706                                           | 11.7169                                          | 9.1860                                                          | 10.1869                                                         | 8.3327                                            | 6.4455                                           |
| b [Å]                   | 9.1725                                                          | 13.0303                                          | 37.416                                           | 13.2712                                                         | 13.2164                                                         | 9.9524                                            | 11.5324                                          |
| c [Å]                   | 25.594                                                          | 21.6554                                          | 8.5164                                           | 32.6386                                                         | 16.2017                                                         | 23.283                                            | 13.9706                                          |
| Alpha [deg]             | 90                                                              | 90                                               | 90                                               | 84.348                                                          | 104.630                                                         | 90                                                | 96.465                                           |
| Beta [deg]              | 97.276                                                          | 95.183                                           | 108.750                                          | 88.603                                                          | 105.673                                                         | 91.689                                            | 93.121                                           |
| Gamma[deg]              | 90                                                              | 90                                               | 90                                               | 78.751                                                          | 102.379                                                         | 90                                                | 90.160                                           |
| Z                       | 4                                                               | 4                                                | 4                                                | 2                                                               | 2                                                               | 4                                                 | 2                                                |
| V [Å <sup>3</sup> ]     | 2028.4                                                          | 2155.6                                           | 3535.5                                           | 3883.5                                                          | 1936.3                                                          | 1930.0                                            | 1030.29                                          |
| D [g cm <sup>-3</sup> ] | 1.298                                                           | 1.302                                            | 1.260                                            | 1.268                                                           | 1.298                                                           | 1.347                                             | 1.304                                            |
| Space group             | P 1 21/c 1                                                      | P 1 21/n 1                                       | P 1 21/c 1                                       | P -1                                                            | P -1                                                            | P 1 21/c 1                                        | P -1                                             |
| Mu [mm <sup>-1</sup> ]  | 0.182                                                           | 0.171                                            | 0.131                                            | 0.196                                                           | 0.133                                                           | 0.188                                             | 0.176                                            |
| R [b]                   | 0.0531                                                          | 0.0492                                           | 0.0626                                           | 0.0733                                                          | 0.0656                                                          | 0.0527                                            | 0.0529                                           |
| wR [c]                  | 0.1534                                                          | 0.1370                                           | 0.1582                                           | 0.2139                                                          | 0.2063                                                          | 0.1659                                            | 0.1556                                           |

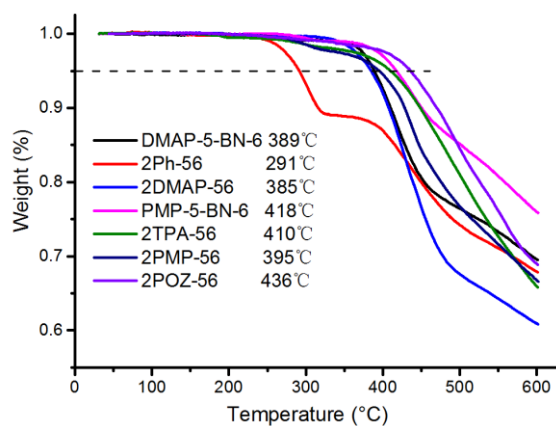

**Figure S23** TGA analysis of compounds in butterfly-shaped

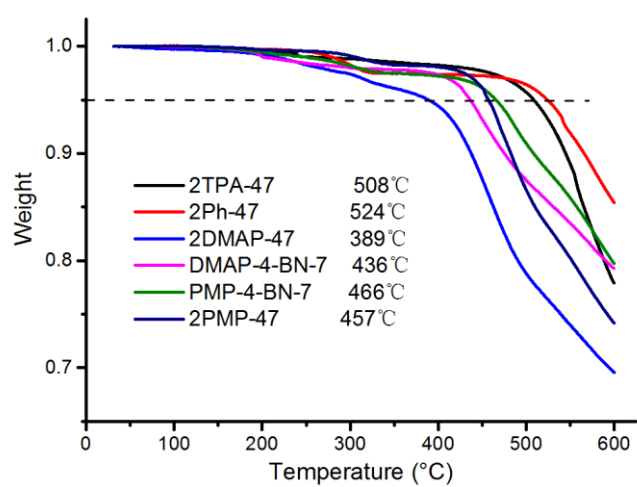

**Figure S24** TGA analysis of compounds in linear-shaped

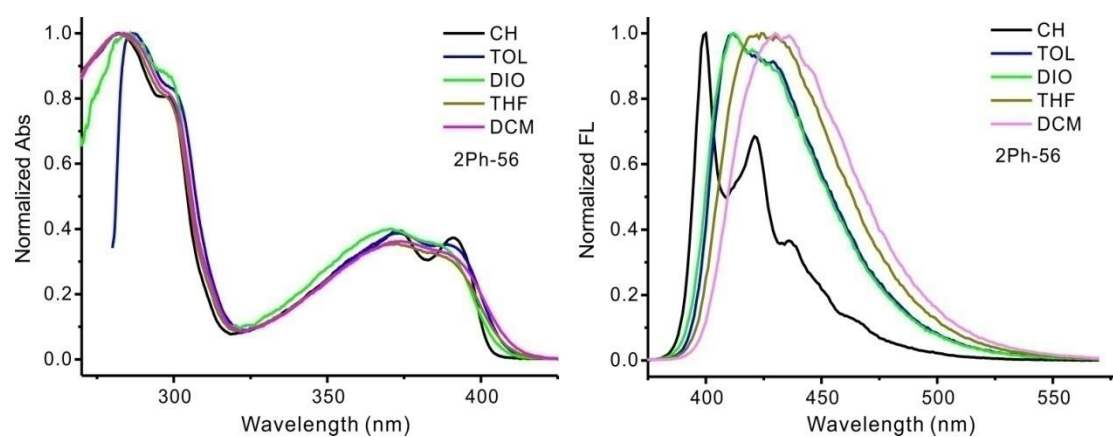

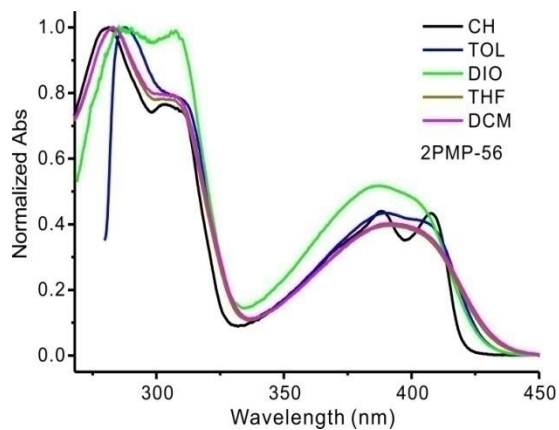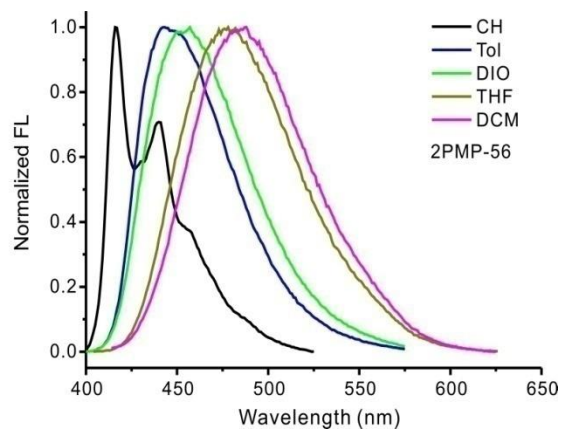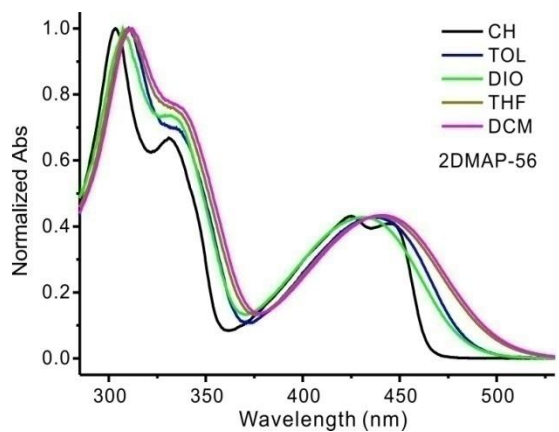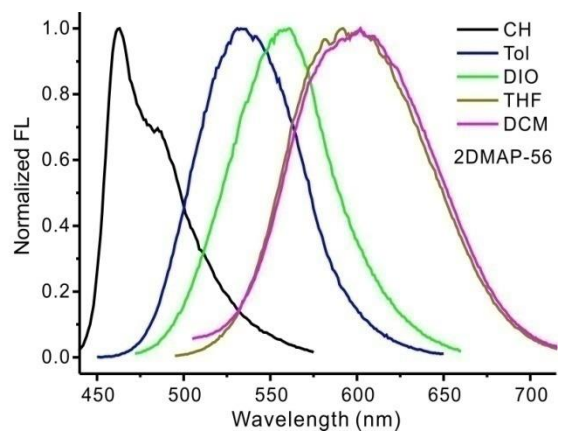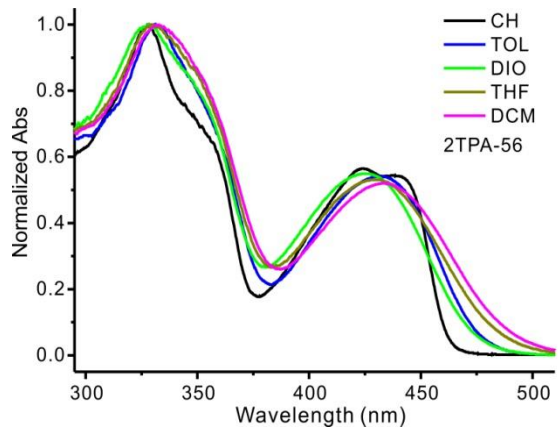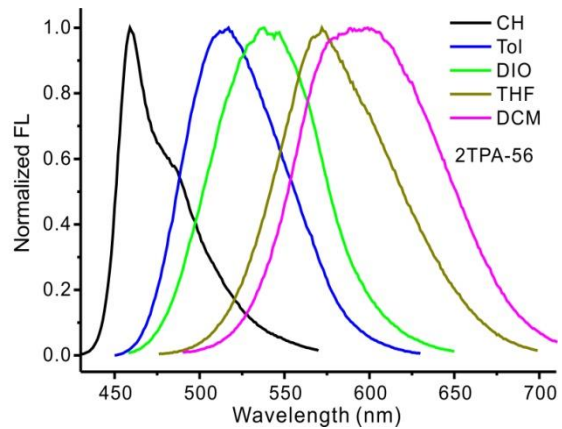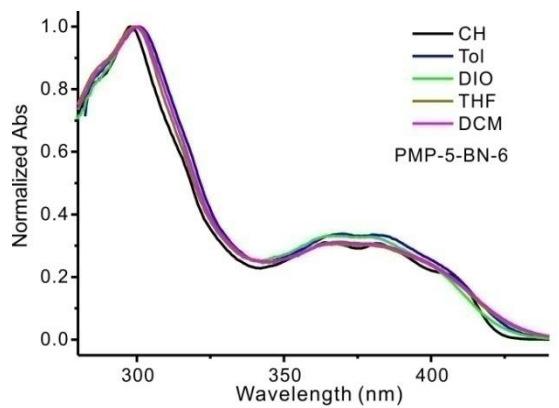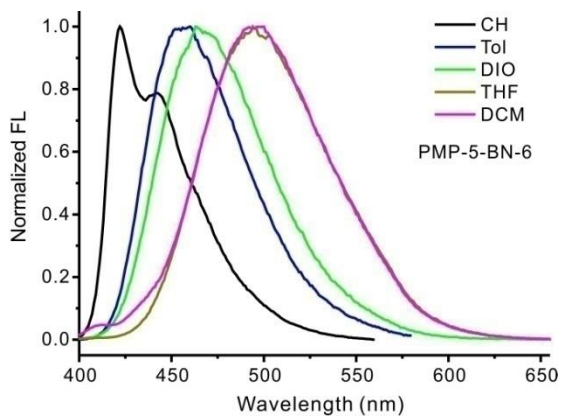

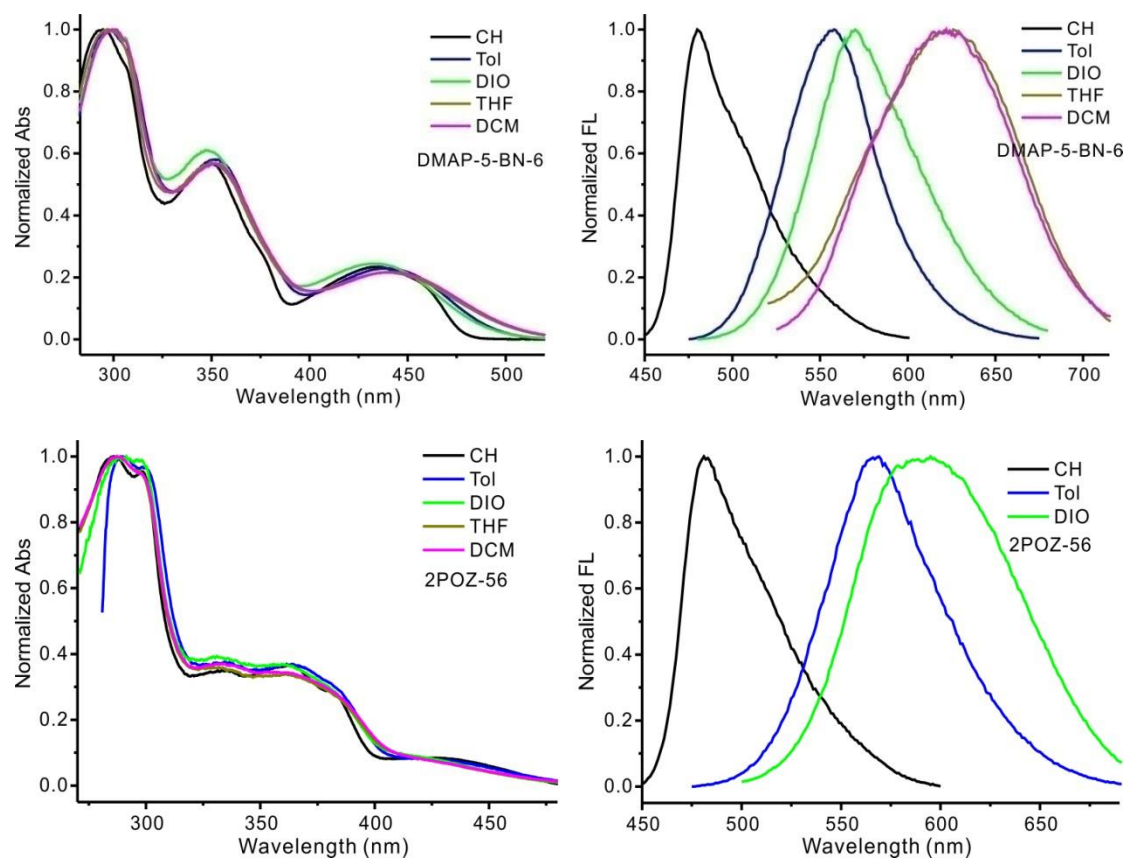

**Figure S25** Solvent effect on absorption and emission of butterfly-shaped compounds

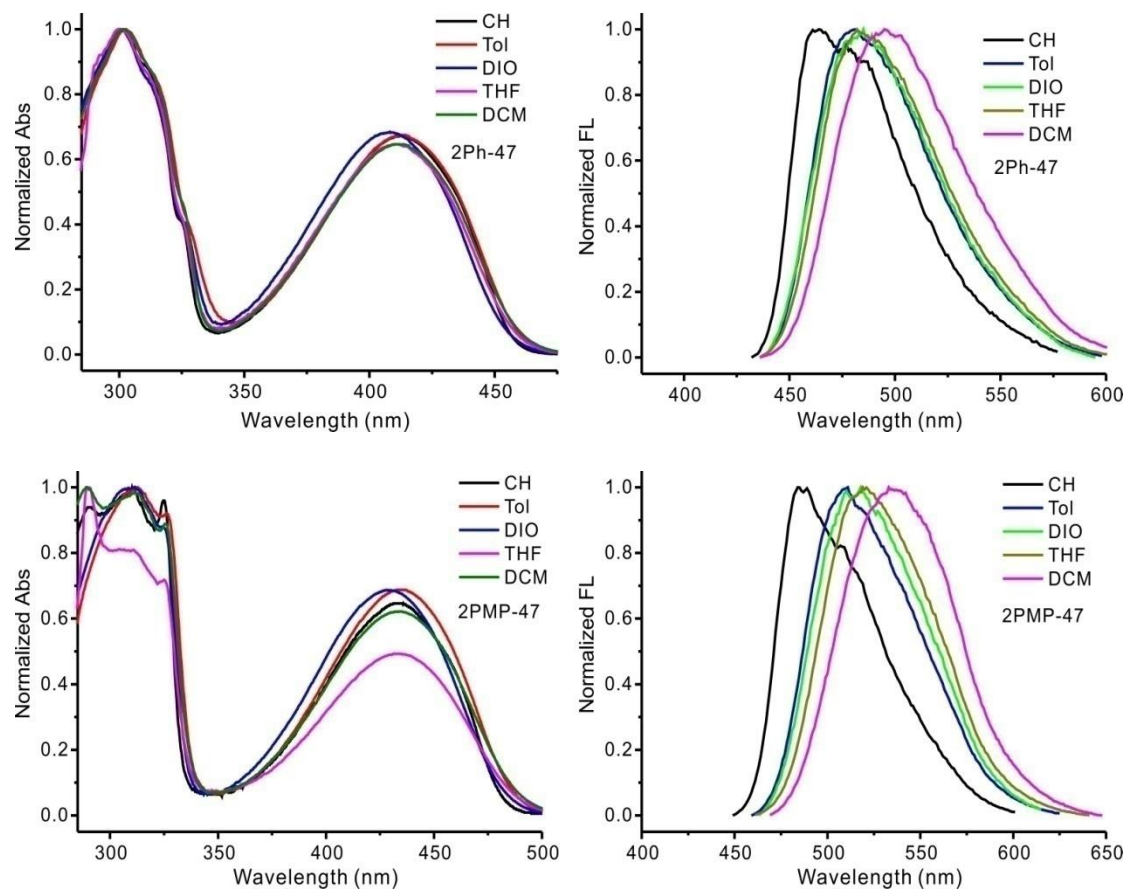



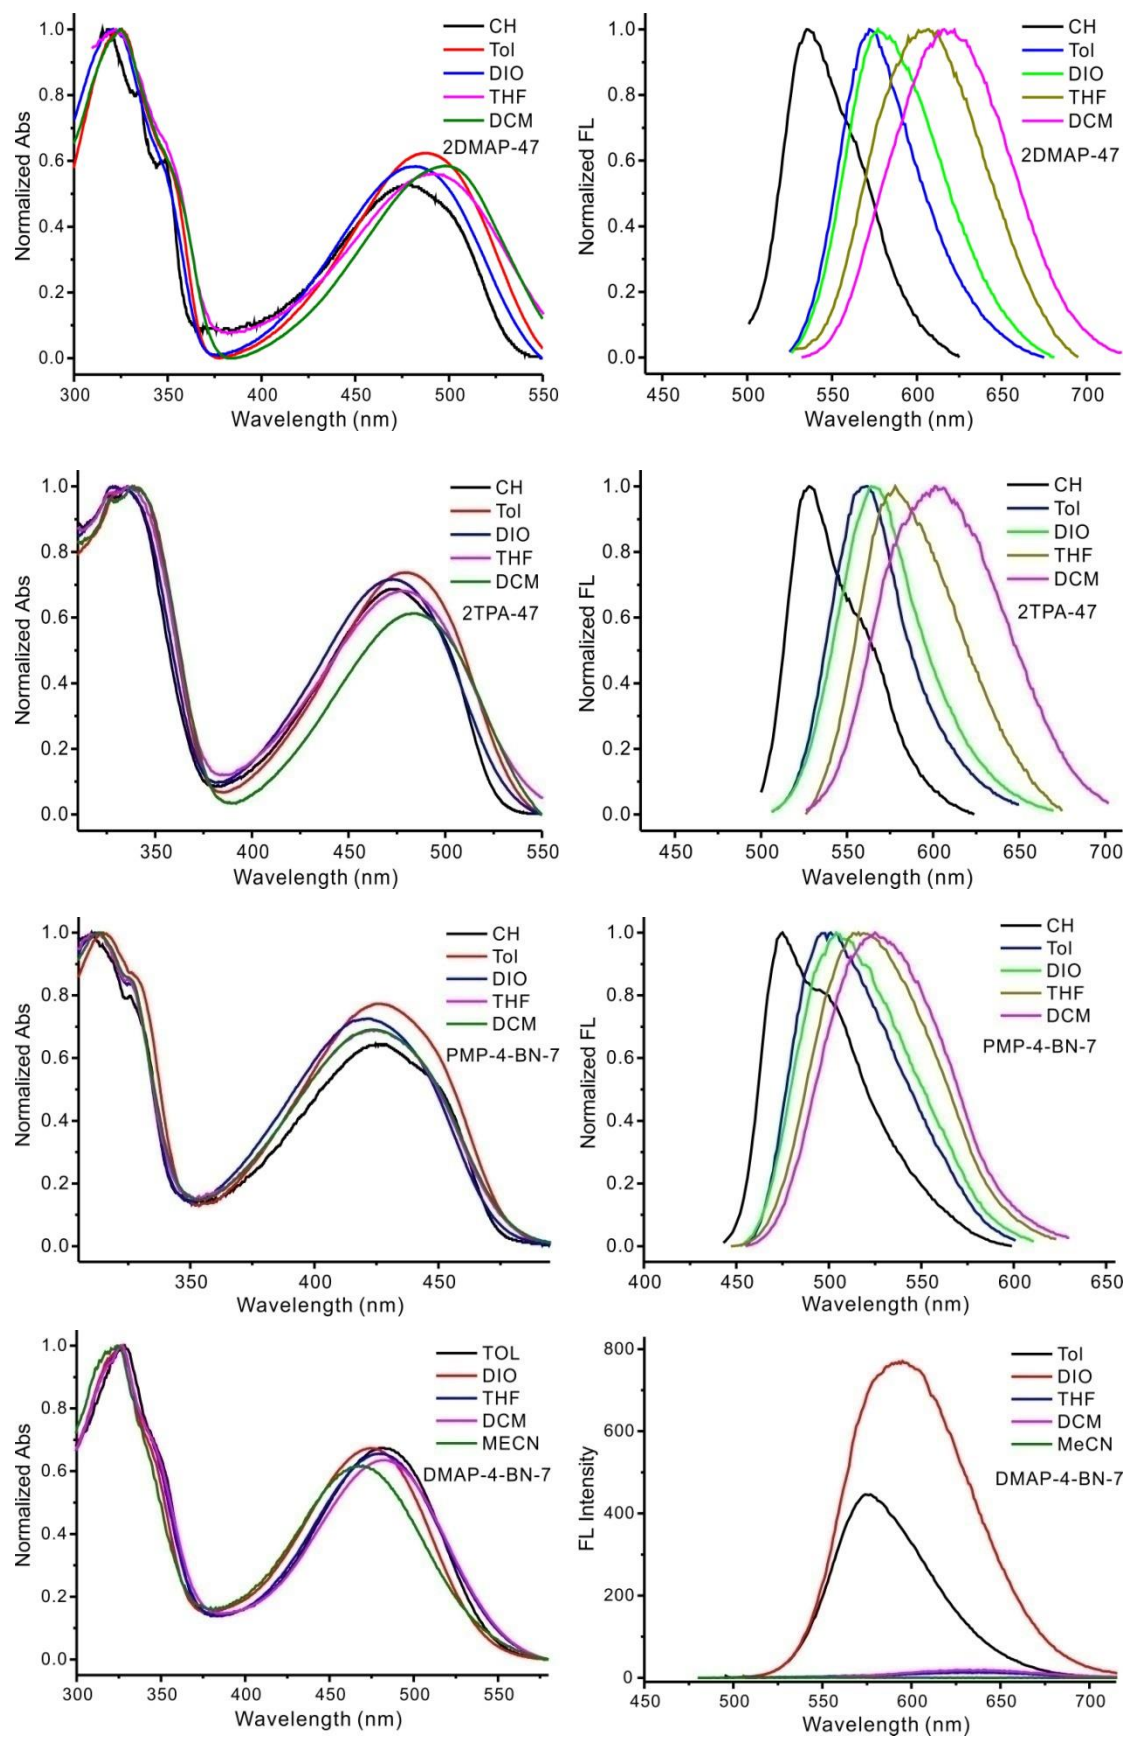

**Figure S26** Solvent effect on absorption and emission of linear-shaped compounds



**Table S2** Solvent effect on absorption and emission

| Compd              | CH                                  |                                    |        | Tol                                 |                                    |        | DIO                                 |                                    |        | THF                                 |                                    |        | DCM                                 |                                    |        |
|--------------------|-------------------------------------|------------------------------------|--------|-------------------------------------|------------------------------------|--------|-------------------------------------|------------------------------------|--------|-------------------------------------|------------------------------------|--------|-------------------------------------|------------------------------------|--------|
|                    | $\lambda_{\text{max}}^{\text{abs}}$ | $\lambda_{\text{SOL}}^{\text{em}}$ | Stokes |
| <b>2Ph-56</b>      | 282,373<br>391                      | 400,421,<br>436                    | 9      | 287,373<br>389                      | 412                                | 23     | 284,370                             | 412                                | 42     | 281,373                             | 424                                | 51     | 282,374                             | 430                                | 56     |
| <b>2PMP-56</b>     | 285,388,408                         | 416,440                            | 8      | 287,390                             | 443                                | 37     | 284,305,<br>388                     | 457                                | 69     | 283,393                             | 478                                | 85     | 286,392                             | 488                                | 96     |
| <b>2DMAP-56</b>    | 303,331425,446                      | 463                                | 17     | 310,436                             | 531                                | 95     | 307,432                             | 561                                | 129    | 309,439                             | 600                                | 161    | 311,441                             | 602                                | 161    |
| <b>2TPA-56</b>     | 327,423,441                         | 459                                | 18     | 331,431                             | 517                                | 86     | 328,424                             | 538                                | 114    | 329,432                             | 572                                | 140    | 332,434                             | 599                                | 165    |
| <b>2-POZ-56</b>    | 286,363,382                         | 481                                | 99     | 289,364                             | 569                                | 205    | 287,361                             | 595                                | 234    | -----                               | -----                              | -----  | -----                               | -----                              | -----  |
|                    |                                     |                                    |        |                                     |                                    |        |                                     |                                    |        |                                     |                                    |        |                                     |                                    |        |
| <b>2Ph-47</b>      | 301,413                             | 464,475                            | 51     | 302,414                             | 481                                | 67     | 300,408                             | 485                                | 77     | 300,411                             | 483                                | 72     | 302,411                             | 495                                | 84     |
| <b>2PMP-47</b>     | 310,432                             | 484,507                            | 62     | 313,435                             | 511                                | 76     | 311,429                             | 518                                | 89     | 312,433                             | 519                                | 86     | 310,434                             | 533                                | 99     |
| <b>2DMAP-47</b>    | 318,478                             | 535                                | 57     | 325,488                             | 572                                | 84     | 320,482                             | 577                                | 95     | 324,492                             | 607                                | 115    | 323,497                             | 616                                | 119    |
| <b>2TPA-47</b>     | 336,473                             | 528                                | 55     | 339,479                             | 561                                | 82     | 329,474                             | 564                                | 90     | 339,478                             | 577                                | 99     | 338,485                             | 601                                | 116    |
|                    |                                     |                                    |        |                                     |                                    |        |                                     |                                    |        |                                     |                                    |        |                                     |                                    |        |
| <b>PMP-5-BN-6</b>  | 298,381                             | 422,442                            | 17     | 300,380                             | 460                                | 80     | 300,379                             | 463                                | 84     | 300,368                             | 494                                | 126    | 301,379                             | 500                                | 121    |
| <b>DMAP-5-BN-6</b> | 349,435                             | 480                                | 45     | 352,439                             | 558                                | 119    | 347,433                             | 570                                | 137    | 298,350,434                         | 626                                | 184    | 349,443                             | 622                                | 179    |
| <b>PMP-4-BN-7</b>  | 310,426                             | 475,495                            | 49     | 315,426                             | 501                                | 75     | 313,422                             | 504                                | 82     | 313,423                             | 517                                | 94     | 314,424                             | 525                                | 101    |
| <b>DMAP-4-BN-7</b> | -----                               | -----                              | -----  | 328,485                             | 574                                | 89     | 327,475                             | 595                                | 120    | 325,480                             | -----                              | -----  | 327,481                             | -----                              | -----  |

**Table S3** Dipole moments of molecules in ground states and in excited states

| Compd              | $\mu_g$ (D) <sup>a</sup> | $\Delta\mu_{eg}$ <sup>b</sup> | $\mu_e$ (D) <sup>c</sup> |
|--------------------|--------------------------|-------------------------------|--------------------------|
| <b>2Ph-56</b>      | 5.0                      | 10.1                          | 15.1                     |
| <b>2PMP-56</b>     | 5.6                      | 16.5                          | 22.1                     |
| <b>2DMAP-56</b>    | 12.2                     | 18.3                          | 30.5                     |
| <b>2TPA-56</b>     | 8.1                      | 22.4                          | 30.5                     |
| <b>PMP-5-BN-6</b>  | 2.9                      | 16.1                          | 19.0                     |
| <b>DMAP-5-BN-6</b> | 6.5                      | 16.7                          | 23.2                     |
| <b>2Ph-47</b>      | 2.2                      | 8.3                           | 10.5                     |
| <b>2PMP-47</b>     | 5.4                      | 11.0                          | 16.4                     |
| <b>2DMAP-47</b>    | 2.0                      | 10.4                          | 12.4                     |
| <b>2TPA-47</b>     | 2.2                      | 12.6                          | 14.8                     |
| <b>PMP-4-BN-7</b>  | 9.2                      | 12.2                          | 21.4                     |
| <b>DMAP-4-BN-7</b> | 12.6                     | ----                          | ---                      |

(a) Dipole moments in ground state ( $\mu_g$ ) are calculated based on Gaussian 09 applying 6-31G-B3LYP as method; (b) dipole moment changes obtained by the modified Lippert-Mataga equation<sup>(5)</sup>; (c) dipole moments in excited states, calculated from the equation of  $\mu_e = \Delta\mu_{eg} + \mu_g$ .

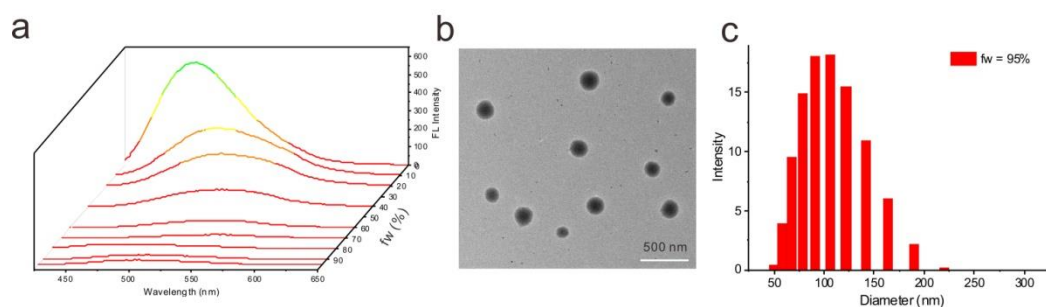

**Figure S27** (a) Emission spectra of **2PMP-56** in aqueous THF solutions; (b) TEM image of **2PMP-56** in 95% water fraction; (c) DLS analysis of **2PMP-56** in 95% water fraction

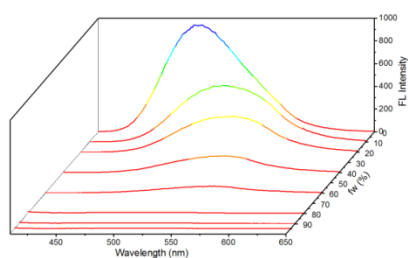

**Figure S28** Emission spectra of **PMP-5-BN-6** in aqueous THF solutions

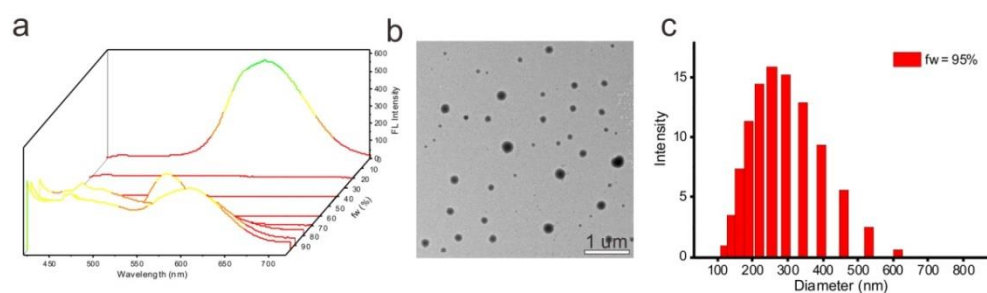

**Figure S29** (a) Emission spectra of **2DMP-56** in aqueous THF solutions; (b) TEM image of **2DMP-56** in 95% water fraction; (c) DLS analysis of **2DMP-56** in 95% water fraction

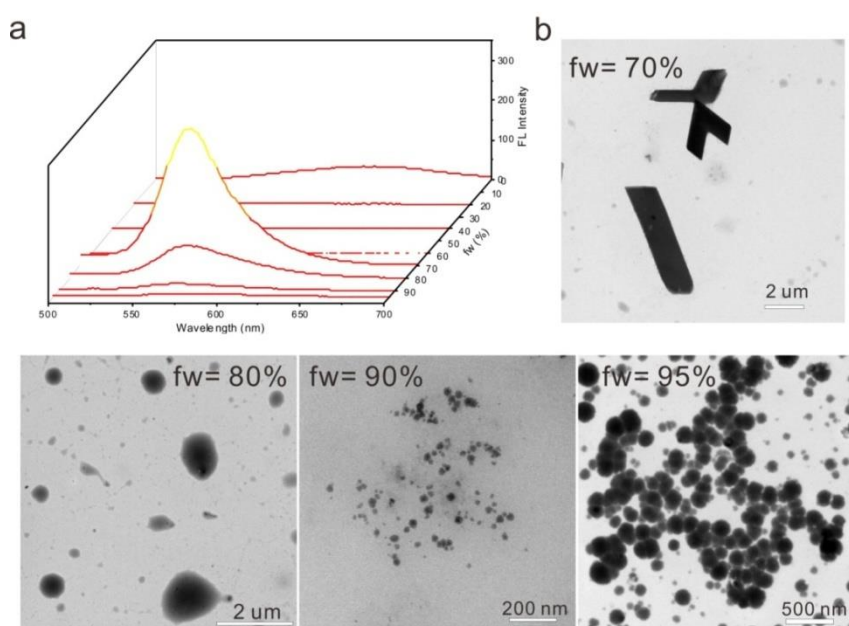

**Figure S30** (a) Emission spectra of **DMAP-5-BN-6** in aqueous THF solutions; (b) TEM image of **DMAP-5-BN-6** in 70%, 80%, 90%, and 95% water fraction, respectively

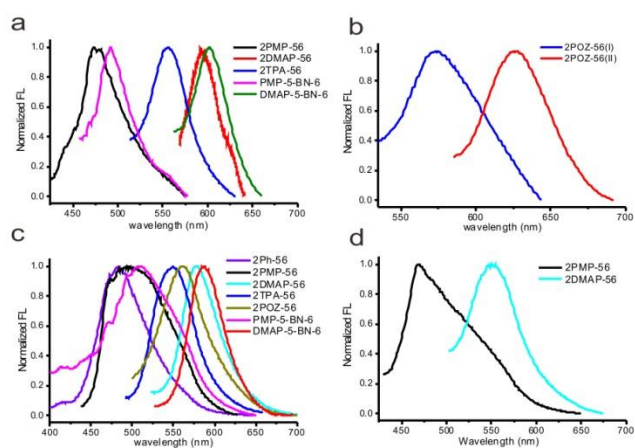

**Figure S31** Emission spectra of butterfly-shaped compounds in crystals (a & b), in pristines (c), in films (d)

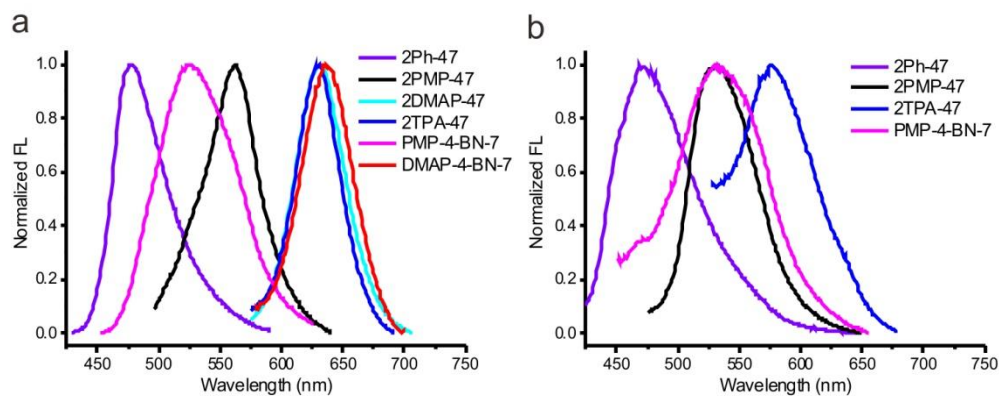

**Figure S32** Emission spectra of linear-shaped compounds in pristines (a), in films (b)

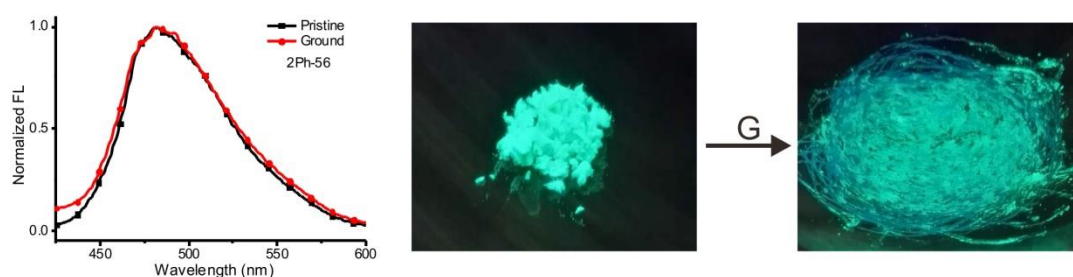

**Figure S33** Emission spectra of **2Ph-56** before and after grinding (left), photos of **2Ph-56** before and after grinding (right)

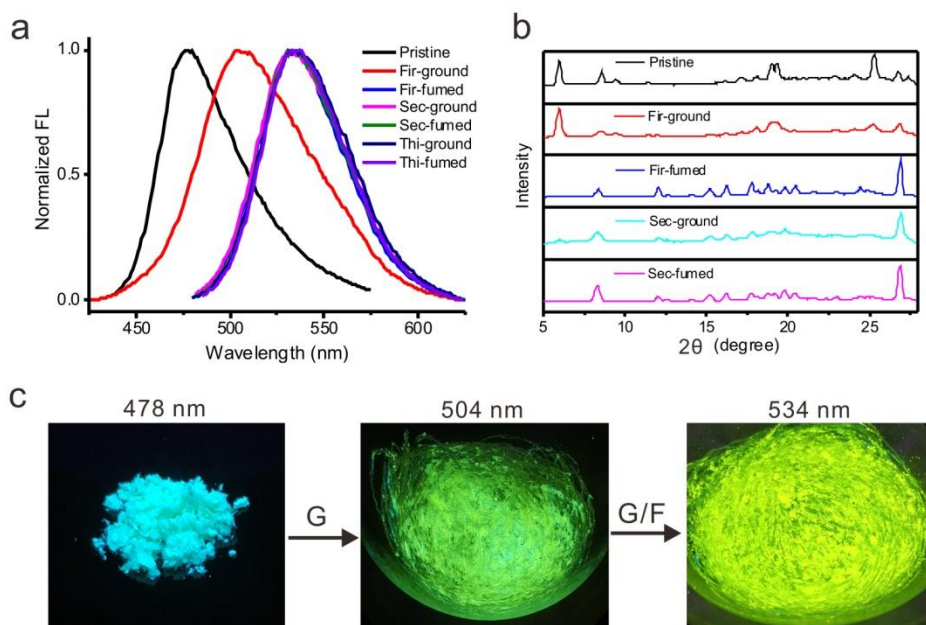

**Figure S34** Emission spectra (a) and XRD diffractions (b) of **2Ph-47** before and after grinding; (c) Photos under UV lamp

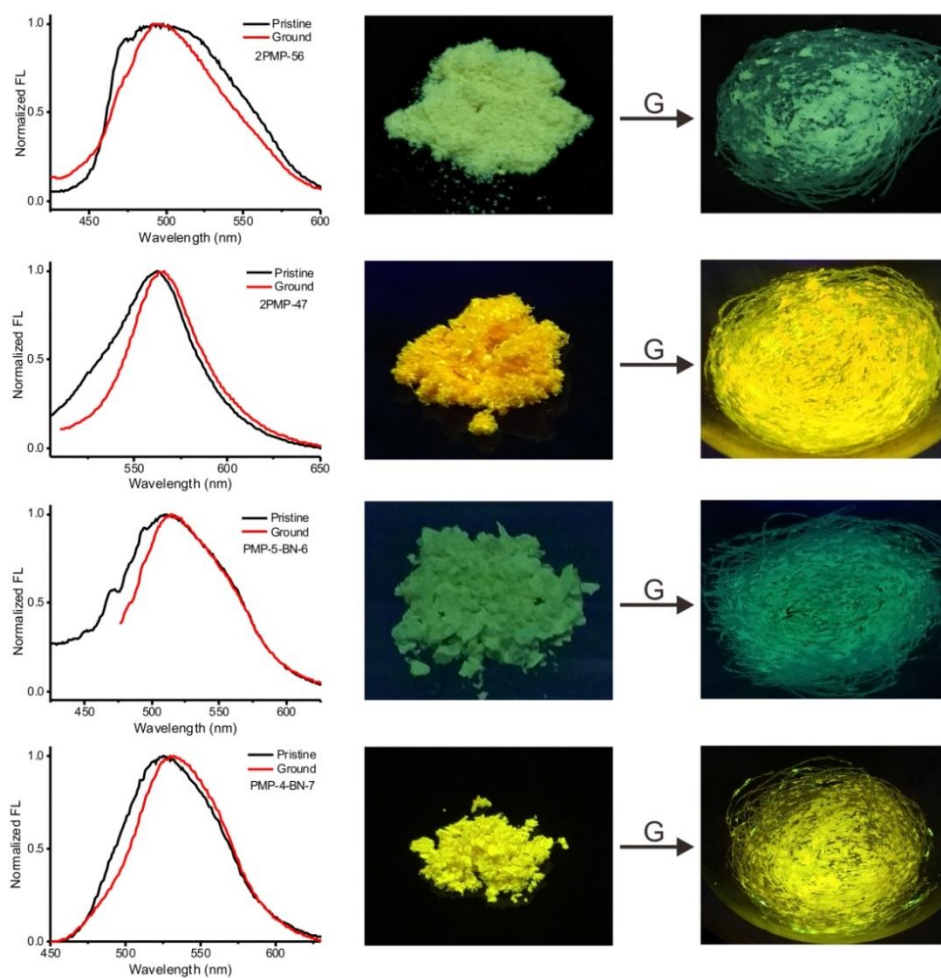

**Figure S35** Emission spectra of **2PMP-56**, **2PMP-47**, **PMP-5-BN-6** and **PMP-4-BN-7** before and after grinding (left); photos under UV lamp(right)

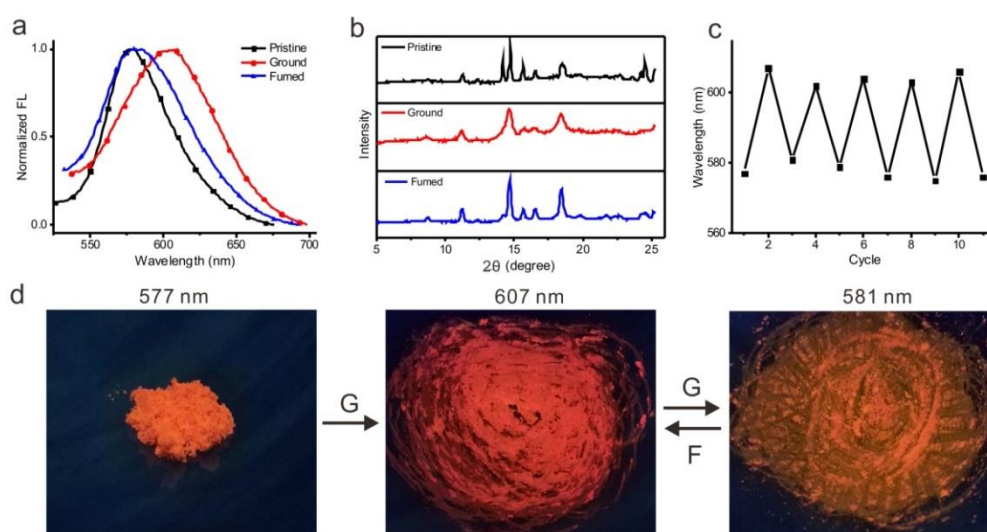

**Figure S36** Emission spectra (a) and XRD diffractions (b) of **2DMAP-56** before and after grinding/fuming; (c) Reversible changes of emission intensities of **2DMAP-56** by grinding and fuming; (d) Photos under UV lamp



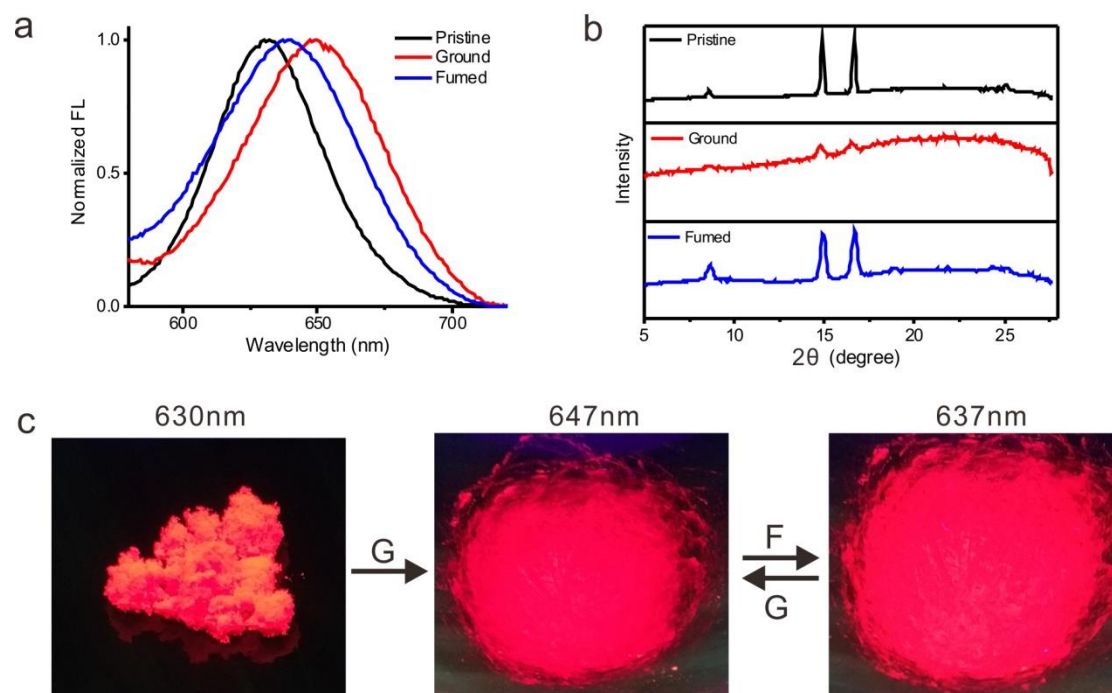

**Figure S37** Emission spectra (a) and XRD diffractions (b) of **2DMAP-47** before and after grinding/fuming; (c) Photos under UV lamp

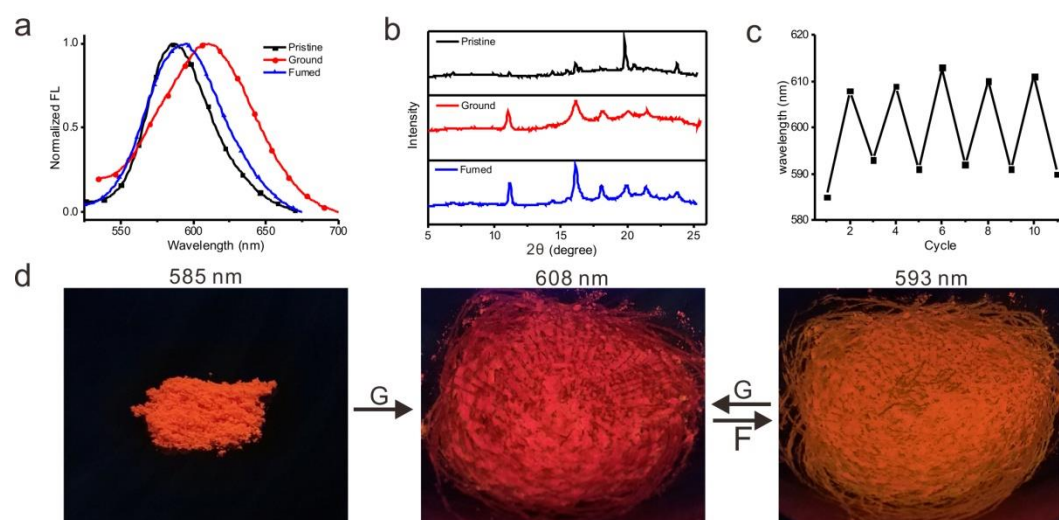

**Figure S38** Emission spectra (a) and XRD diffractions (b) of **DMAP-5-BN-6** before and after grinding/fuming; (c) Reversible changes of emission intensities of **DMAP-5-BN-6** by grinding and fuming; (d) Photos under UV lamp

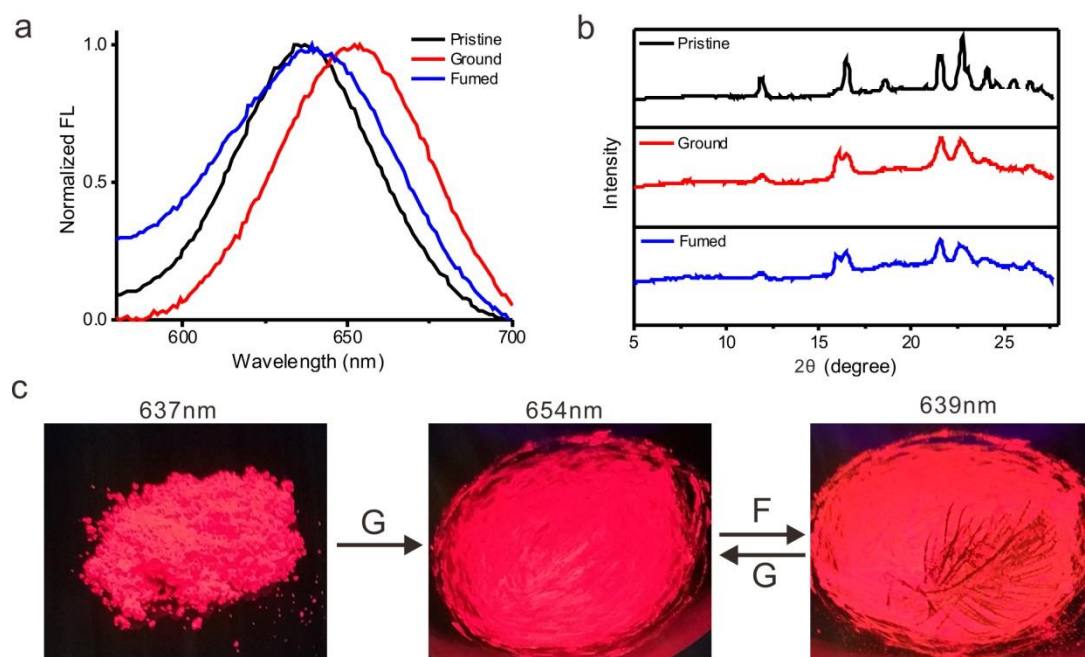

**Figure S39** Emission spectra (a) and XRD diffractions (b) of **DMAP-4-BN-7** before and after grinding/fuming; (c) Photos under UV lamp

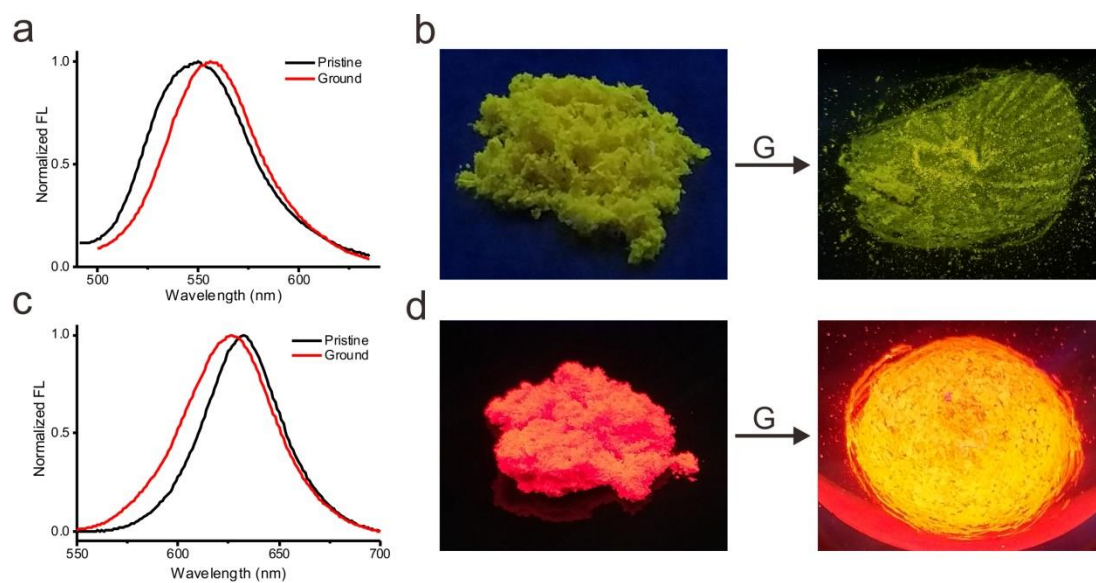

**Figure S40** Emission spectra of **2TPA-56** (a) and **2TPA-47** (c) before and after grinding; photos of **2TPA-56** (b) and **2TPA-47** (d) before and after grinding under UV lamp

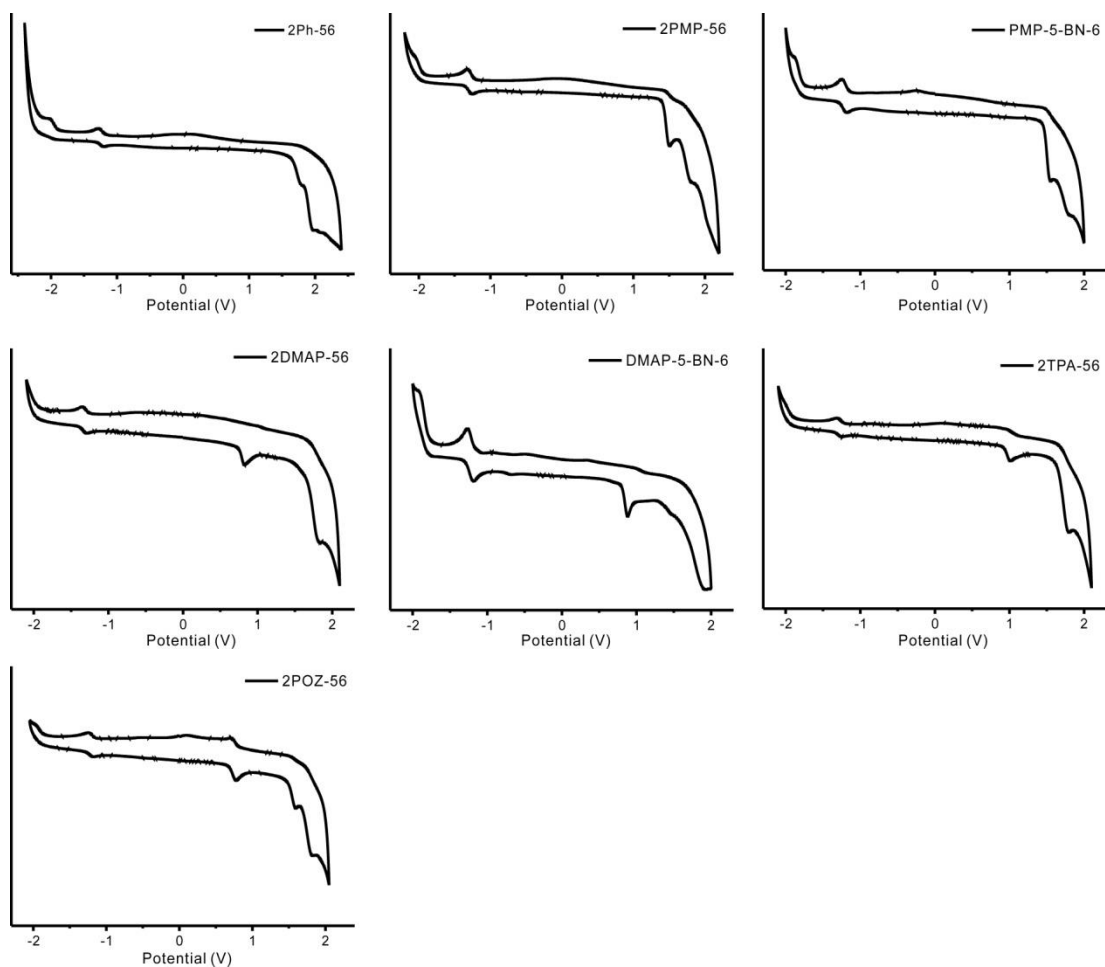

**Figure S41.** Cyclic voltammograms of butterfly-shaped compounds

**Table S4** Electrochemical properties and theoretical calculations

| Compounds          | HOMO            |                   | LUMO            |                   | E <sub>g</sub>  |                   |                 |
|--------------------|-----------------|-------------------|-----------------|-------------------|-----------------|-------------------|-----------------|
|                    | CV <sup>a</sup> | Cald <sup>b</sup> | CV <sup>a</sup> | Cald <sup>b</sup> | CV <sup>a</sup> | Cald <sup>b</sup> | UV <sup>c</sup> |
| <b>2Ph-56</b>      | -6.15           | -6.33             | -3.16           | -3.20             | 2.99            | 3.13              | 3.06            |
| <b>2PMP-56</b>     | -5.90           | -5.97             | -3.11           | -3.05             | 2.79            | 2.92              | 2.90            |
| <b>2DMAP-56</b>    | -5.23           | -5.27             | -3.06           | -2.75             | 2.17            | 2.52              | 2.52            |
| <b>2TPA-56</b>     | -5.41           | -5.37             | -3.12           | -3.00             | 2.29            | 2.37              | 2.59            |
| <b>2POZ-56</b>     | -5.15           | -5.51             | -3.18           | -2.94             | 1.97            | 2.57              | 2.87            |
| <b>PMP-5-BN-6</b>  | -5.95           | -6.21             | -3.17           | -3.40             | 2.78            | 2.81              | 2.93            |
| <b>DMAP-5-BN-6</b> | -5.28           | -5.54             | -3.17           | -3.23             | 2.11            | 2.31              | 2.48            |

a. Cyclic voltammograms of compounds measured in MeCN:DCM=3:1 solution using n-Bu<sub>4</sub>NPF<sub>6</sub> as the supporting electrolyte and SCE as the reference electrode. HOMO = E<sub>ref</sub> - E<sub>ox</sub> (peak potential), LUMO = E<sub>ref</sub> - E<sub>red</sub> (peak potential), E<sub>g</sub> = HOMO - LUMO. b. calculated by the DFT method at the B3LYP/6-31G\* basis set, E<sub>g</sub> = HOMO - LUMO. c. E<sub>g</sub> = 1241/λ<sub>uv,onset</sub> in THF.



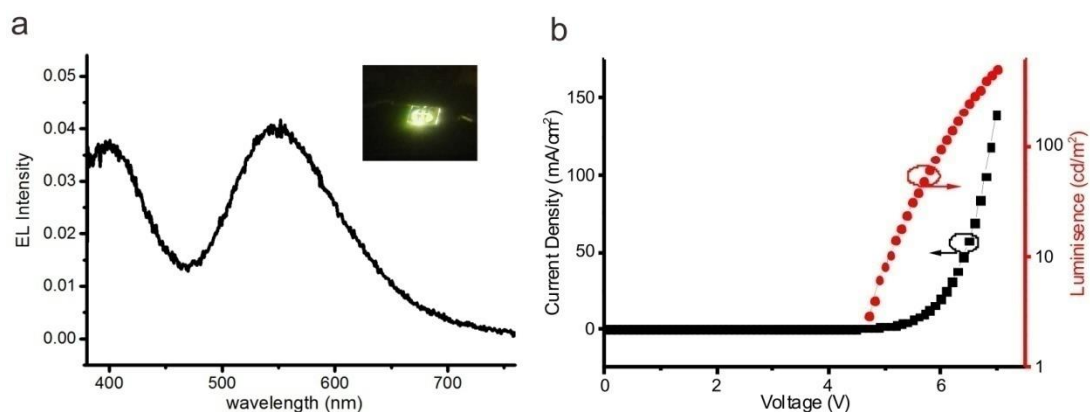

**Figure S42** (a) Spectrum of **DMAP-5-BN-6** based device operating at a voltage of 7 v. Inset: Image of device; (b) Current-density-voltage (L-J-V) characteristics

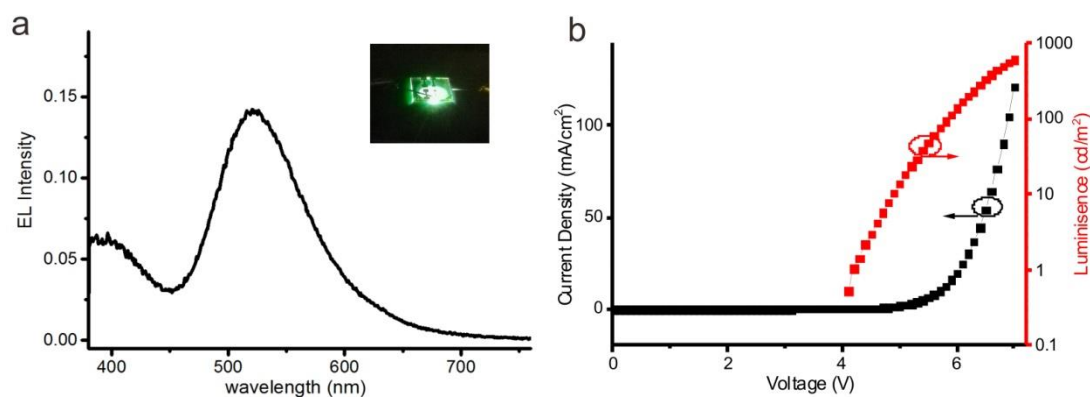

**Figure S43** (a) EL Spectrum of **2TPA-56** based device operating at a voltage of 7 v. Inset: Image of device; (b) Current-density-voltage (L-J-V) characteristics

**Table S5** Performance of OLED devices<sup>a</sup>

| Compound           | $V_{\text{turn-on}}^b$<br>(v) | CIE <sup>c</sup> <sub>1931</sub><br>(x,y) | EL <sup>d</sup><br>(nm) | Device performances at<br>100cd/m <sup>2</sup> |           |              |
|--------------------|-------------------------------|-------------------------------------------|-------------------------|------------------------------------------------|-----------|--------------|
|                    |                               |                                           |                         | EQE<br>(%)                                     | CE (cd/A) | PE<br>(lm/W) |
| <b>DMAP-5-BN-6</b> | 4.5                           | (0.33,0.41)                               | 400,551                 | 0.19                                           | 0.47      | 0.24         |
| <b>2TPA-56</b>     | 4.2                           | (0.27,0.47)                               | 403,521                 | 0.26                                           | 0.73      | 0.40         |
| <b>2POZ-56</b>     | 4.7                           | (0.32,0.35)                               | 403,555                 | 0.29                                           | 0.53      | 0.27         |

<sup>a</sup> Device structure: ITO / PEDOT : PSS (40 nm) / m<sub>Compd</sub> : m<sub>PVK</sub> (1 : 16) / TPBI (30nm) / LiF (1 nm) / Al (60 nm), <sup>b</sup> Turn-on voltage at a brightness of 1 cd/m<sup>2</sup>, <sup>c,d</sup> at voltage of 7 V.

## References

1. S. A. Valenzuela, A. J. Cortes, Z. J. E. Tippins, M. H. Daly, T. E. Keel, B. F. Gherman and J.D. Spence, *J. Org. Chem.*, 2017, **82**, 13297-13312.
2. B. A. D. S. Neto, A. S. Lopes, G. Ebeling, R. S. Goncalves, V. E. U. Costa, F. H. Quinab and J.

Duponta, *Tetrahedron*, 2005, **61**, 10975-10982.

3. P. Gautam, R. Maragani and R. Misra, *RSC Adv.*, 2015, **5**, 18288-18294

4. K.-W. Park, L. A. Serrano, S. Ahn, M. H. Baek, A. A. Wiles, G. Cooke, J. Hong, *Tetrahedron*, 2017, **73**, 1098-1104

5. J. Feng, X.Chen, Q. Han, H. Wang, P. Lu, Y. Wang, *Journal of Luminescence*, 2011, **131**, 2775-2783.
